# Supplementary material for: B2(OH)4-mediated one-pot synthesis of tetrahydroquinoxalines from 2-amino(nitro)anilines and 1,2-dicarbonyl compounds in water
Source: Royal Society of Chemistry journal article supplement (doi:10.1039/c7qo00604g), 2017-01-01

*Supporting Information for*

**B<sub>2</sub>(OH)<sub>4</sub>-mediated one-pot synthesis of tetrahydroquinoxalines from 2-amino(nitro)anilines and 1, 2-dicarbonyl compounds in water**

Sensheng Liu, Yanmei Zhou, Yuebo Sui, Huan Liu, Haifeng Zhou\*

*Hubei Key Laboratory of Natural Products Research and Development, College of Biological and*

*Pharmaceutical Sciences, China Three Gorges University, Yichang 443002, China.*

*Corresponding author: zhouhf@ctgu.edu.cn, Fax: +86(717)639-5580*

|                                                                          |     |
|--------------------------------------------------------------------------|-----|
| 1. General Information.....                                              | S2  |
| 2. General Procedure for the Synthesis of Tetrahydroquinoxalines.....    | S2  |
| 3. Analytical Data of the Products.....                                  | S3  |
| 4. <sup>1</sup> H NMR & <sup>13</sup> C NMR Spectra of the Products..... | S6  |
| 5. The Deuterium Labeling Experiment.....                                | S32 |

## 1. General Information

Unless otherwise noted, all reagents, catalysts and solvents were purchased from commercial suppliers and used without further purification. Column Chromatography was performed with silica gel (200-300 mesh). NMR spectra were recorded on Bruker ADVANCE III (400 MHz) spectrometers. CDCl<sub>3</sub> was the solvent used for the NMR analysis with tetramethylsilane as the internal standard. Chemical shifts were reported up field to TMS (0.00 ppm) for <sup>1</sup>H NMR and relative to CDCl<sub>3</sub> (77.0 ppm) for <sup>13</sup>C NMR.

## 2. General Procedure for the Synthesis of Tetrahydroquinoxalines

### 2.1 Start from 2-Aminoanilines and 1,2-Dicarbonyl Compounds

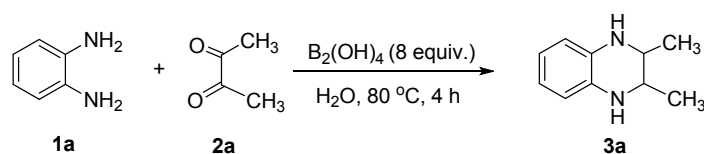

A flask was charged with 2-aminoaniline (**1a**; 1 mmol, 108 mg), 2,3-butanedione (**2a**; 1 mmol, 86 mg), B<sub>2</sub>(OH)<sub>4</sub> (8 mmol, 720 mg, 8 eq.) and water (3 mL) under N<sub>2</sub>. The reaction was stirred at 80 °C for 4 h. When the reaction was complete monitored by TLC, the mixture was cooled to room temperature, extracted with ethyl acetate (3×20 mL). The combined organic phase was washed with water, dried over anhydrous Na<sub>2</sub>SO<sub>4</sub>, filtered, and concentrated under reduced pressure to give a crude product. After determination of the diastereomeric excess by <sup>1</sup>H NMR, the crude product was purified by silica gel column chromatography to give the product **3a** as white solid.

### 2.2 Start from 2-Nitroanilines and 1,2-Dicarbonyl Compounds

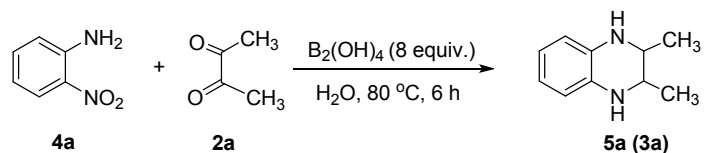

A flask was charged with 2-nitroaniline (**4a**; 1 mmol, 138 mg), 2,3-butanedione (**2a**; 1 mmol, 86 mg), B<sub>2</sub>(OH)<sub>4</sub> (8 mmol, 720 mg, 8 eq.) and water (3 mL) under N<sub>2</sub>. The reaction was stirred at 80 °C for 6 h. When the reaction was complete monitored by TLC, the mixture was cooled to room temperature, extracted with ethyl acetate (3×20 mL). The combined organic phase was

washed with water, dried over anhydrous Na<sub>2</sub>SO<sub>4</sub>, filtered, and concentrated under reduced pressure to give a crude product. After determination of the diastereomeric excess by <sup>1</sup>H NMR, the crude product was purified by silica gel column chromatography to give the product **5a** as white solid.

### 2.3 Determination of *cis/trans* Ratio of the Products

The *cis/trans* ratio of the product was determined by <sup>1</sup>H NMR of the crude reaction mixture. For example, the reaction mixture of **3a** was extracted with ethyl acetate, and the combined organic phase was washed with water, dried over anhydrous Na<sub>2</sub>SO<sub>4</sub>, filtered, and concentrated to give a crude product. The diastereomeric excess (*cis/trans* of **3a** = 70/30) was determined by <sup>1</sup>H NMR spectroscopy of the crude product according to the corresponding signals.

### 3. Analytical Data of the Products

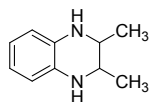

#### 2, 3-Dimethyl-1,2,3,4-tetrahydroquinoline (**3a**)

Purified by flash column chromatography (PE: EA = 3:1), 96% yield (155 mg), white solid.

*cis/trans* = 70/30 (separable).

#### 2, 3-Dimethyl-1,2,3,4-tetrahydroquinoline (**5a**)

Purified by flash column chromatography (PE: EA = 3:1), 82% yield (132mg), white solid.

*cis/trans* = 83/17 (separable).

#### 2, 3-Dimethyl-1,2,3,4-tetrahydroquinoline (**6**)

Purified by flash column chromatography (PE: EA = 3:1), 23% yield (37 mg), white solid.

*cis/trans* = 68/32 (separable).

***cis* isomer (CAS: 7739-04-0)**<sup>1,2</sup>

<sup>1</sup>H NMR (400 MHz, CDCl<sub>3</sub>):  $\delta$  = 6.62 (dd,  $J_1$  = 3.6 Hz,  $J_2$  = 3.2 Hz, 2H), 6.53 (dd,  $J_1$  = 3.6 Hz,  $J_2$  = 3.2 Hz, 2H), 3.54-3.52 (m, 2H), 1.17-1.16 (d,  $J$  = 6.4 Hz, 6H); <sup>13</sup>C NMR (100 MHz, CDCl<sub>3</sub>):  $\delta$  = 132.66, 118.56, 114.42, 49.04, 17.28.

***trans* isomer (CAS: 7739-05-1)**<sup>1,2</sup>

<sup>1</sup>H NMR (400 MHz, CDCl<sub>3</sub>):  $\delta$  = 6.62 (dd,  $J_1$  = 3.6 Hz,  $J_2$  = 3.2 Hz, 2H), 6.54 (dd,  $J_1$  = 3.2 Hz,  $J_2$  = 3.6 Hz, 2H), 3.06 (q,  $J$  = 2.0 Hz, 2H), 1.21 (d,  $J$  = 6.0 Hz, 6H); <sup>13</sup>C NMR (100 MHz, CDCl<sub>3</sub>):  $\delta$

= 133.50, 118.59, 113.93, 52.05, 19.04.

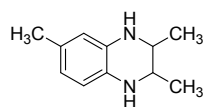

### 2,3,6-Trimethyl-1,2,3,4-tetrahydroquinoxaline (3b)

Purified by flash column chromatography (PE: EA = 3:1), 95% yield (167 mg), white solid.

*cis/trans* = 65/35 (separable).

### 2,3,6-Trimethyl-1,2,3,4-tetrahydroquinoxaline (5b)

Purified by flash column chromatography (PE: EA = 3:1), 85% yield (149 mg), white solid.

*cis/trans* = 67/33 (separable).

#### *cis* isomer (CAS: 1350827-80-3) <sup>2</sup>

<sup>1</sup>H NMR (400 MHz, CDCl<sub>3</sub>):  $\delta$  = 6.45 (t,  $J$  = 3.6 Hz, 2H), 6.38 (d,  $J$  = 1.6 Hz, 1H), 3.52-3.49 (m, 4H), 2.22 (s, 3H), 1.16 (d,  $J$  = 6.4 Hz, 6H); <sup>13</sup>C NMR (100 MHz, CDCl<sub>3</sub>):  $\delta$  = 132.70, 130.12, 128.17, 118.96, 115.15, 114.69, 49.18, 49.15, 20.75, 17.24, 17.21.

#### *trans* isomer (CAS: 1350827-88-1) <sup>2</sup>

<sup>1</sup>H NMR (400 MHz, CDCl<sub>3</sub>):  $\delta$  = 6.45 (t,  $J$  = 8.0 Hz, 2H), 6.37 (d,  $J$  = 2.0 Hz, 1H), 3.09 (s, 2H), 2.21 (s, 3H), 1.19 (dd,  $J_1$  = 2.0 Hz,  $J_2$  = 1.6 Hz, 6H); <sup>13</sup>C NMR (100 MHz, CDCl<sub>3</sub>):  $\delta$  = 133.55, 130.94, 128.20, 118.92, 114.66, 114.21, 52.21, 20.71, 19.08.

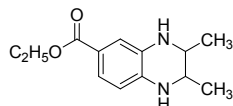

### Ethyl 2,3-dimethyl-1,2,3,4-tetrahydroquinoxaline-6-carboxylate (3c)

Purified by flash column chromatography (PE: EA = 5:1), 93% yield (217 mg), white solid.

*cis/trans* = 69/31 (inseparable).

#### Mixture of *cis* and *trans* isomer of 3c (inseparable)

<sup>1</sup>H NMR (400 MHz, CDCl<sub>3</sub>):  $\delta$  = 7.36 (dd,  $J_1$  = 1.6 Hz,  $J_2$  = 2.0 Hz, 1H), 7.23 (dd,  $J_1$  = 2.0 Hz,  $J_2$  = 2.0 Hz, 1H), 6.46 (dd,  $J_1$  = 3.6 Hz,  $J_2$  = 4.0 Hz, 1H), 4.33 (dd,  $J_1$  = 7.6 Hz,  $J_2$  = 7.6 Hz, 2H), 3.63-3.48 (m, 2H, *cis*), 3.16-2.99 (m, 1H, *trans*), 1.38 (dd,  $J_1$  = 6.4 Hz,  $J_2$  = 8.0 Hz, 3H), 1.22 (d,  $J$  = 6.0 Hz, 2H, *trans*), 1.17 (t,  $J$  = 6.4 Hz, 4H, *cis*); <sup>13</sup>C NMR (100 MHz, CDCl<sub>3</sub>):  $\delta$  = 167.09, 138.05 (*trans*), 137.44 (*cis*), 132.21 (*trans*), 131.43 (*cis*), 121.61 (*trans*), 121.53 (*cis*), 119.49 (*trans*), 119.45 (*cis*), 115.19 (*trans*), 114.76 (*cis*), 112.42 (*trans*), 112.02 (*cis*), 60.14, 52.24 (*trans*), 51.40 (*trans*), 49.22 (*cis*), 48.49 (*cis*), 19.06 (*trans*), 18.89 (*trans*), 17.35 (*cis*), 17.09 (*cis*), 14.49.

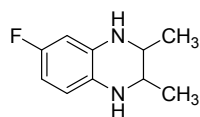

**6-Fluoro-2,3-dimethyl-1,2,3,4-tetrahydroquinoxaline (3d)<sup>2</sup>**

Purified by flash column chromatography (PE: EA = 5:1), 90% yield (162 mg), white solid.

*cis/trans* = 56/44 (inseparable).

**6-Fluoro-2,3-dimethyl-1,2,3,4-tetrahydroquinoxaline (5c)<sup>2</sup>**

Purified by flash column chromatography (PE: EA = 5:1), 76% yield (137 mg), white solid.

*cis/trans* = 67/33 (inseparable).

**Mixture of *cis* and *trans* isomer of 3d (inseparable)<sup>2</sup>**

<sup>1</sup>H NMR (400 MHz, CDCl<sub>3</sub>): δ = 6.40-6.37 (m, 1H), 6.27-6.19 (m, 2H), 3.48-3.41 (m, 2H, *cis*), 3.04-2.92 (m, 1H, *trans*), 1.16 (dd, *J*<sub>1</sub> = 1.6 Hz, *J*<sub>2</sub> = 1.6 Hz, 3H, *trans*), 1.11 (dd, *J*<sub>1</sub> = 1.6 Hz, *J*<sub>2</sub> = 1.2 Hz, 6H, *cis*); <sup>13</sup>C NMR (100 MHz, CDCl<sub>3</sub>): δ = 157.41 (d, *J* = 300 Hz, 1C), 134.59 (d, *J* = 11.0 Hz, 1C, *trans*), 133.82 (d, *J* = 11.0 Hz, 1C, *cis*), 129.15 (*trans*), 128.26 (*cis*), 114.80 (d, *J* = 9.2 Hz, 1C, *cis*), 114.30 (d, *J* = 9.2 Hz, 1C, *trans*), 103.86 (d, *J* = 5.4 Hz, 1C, *cis*), 103.64 (d, *J* = 5.4 Hz, 1C, *trans*), 101.00 (d, *J* = 25.9 Hz, 1C, *cis*), 100.55 (d, *J* = 25.9 Hz, 1C, *trans*), 52.14 (*trans*), 51.87 (*trans*), 49.07(*cis*), 48.91(*cis*), 18.99 (*trans*), 18.88 (*trans*), 17.11(*cis*).

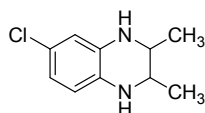

**6-Chloro-2,3-dimethyl-1,2,3,4-tetrahydroquinoxaline (3e)<sup>2</sup>**

Purified by flash column chromatography (PE: EA = 5:1), 92% yield (180 mg), white solid.

*cis/trans* = 66/34 (separable).

**6-Chloro-2,3-dimethyl-1,2,3,4-tetrahydroquinoxaline (5d)<sup>2</sup>**

Purified by flash column chromatography (PE: EA = 5:1), 81% yield (159 mg), white solid.

*cis/trans* = 63/37 (separable).

***cis* isomer:** <sup>1</sup>H NMR (400 MHz, CDCl<sub>3</sub>): δ = 6.67 (dd, *J*<sub>1</sub> = 2.4 Hz, *J*<sub>2</sub> = 2.0 Hz, 1H), 6.62 (d, *J* = 2.4 Hz, 1H), 6.37 (d, *J* = 8.4 Hz, 1H) 3.63 (s, 2H), 3.53-3.48 (m, 2H), 1.14 (d, *J* = 6.4 Hz, 6H); <sup>13</sup>C NMR (100 MHz, CDCl<sub>3</sub>): δ = 134.12, 131.62, 120.69, 116.39, 115.28, 109.99, 48.85, 48.80, 17.23, 17.16.

***trans* isomer:** <sup>1</sup>H NMR (400 MHz, CDCl<sub>3</sub>): δ = 6.54 (dd, *J*<sub>1</sub> = 2.4 Hz, *J*<sub>2</sub> = 2.0 Hz, 1H), 6.49 (d, *J* = 2.0 Hz, 1H), 6.43 (d, *J* = 8.4 Hz, 1H), 3.05-2.99 (m, 2H), 1.19 (dd, *J*<sub>1</sub> = 1.2 Hz, *J*<sub>2</sub> = 1.2 Hz, 6H),

$^{13}\text{C}$  NMR (100 MHz,  $\text{CDCl}_3$ ):  $\delta = 134.51, 131.85, 123.03, 117.79, 114.46, 113.26, 51.90, 18.95, 18.92$ .

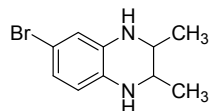

**6-Bromo-2,3-dimethyl-1,2,3,4-tetrahydroquinoxaline (3f)<sup>2</sup>**

Purified by flash column chromatography (PE: EA = 5:1), 89% yield (213 mg), white solid.

*cis/trans* = 62/38(separable).

**6-Bromo-2,3-dimethyl-1,2,3,4-tetrahydroquinoxaline (5e)<sup>2</sup>**

Purified by flash column chromatography (PE: EA = 5:1), 65% yield (156 mg), white solid.

*cis/trans* = 64/36(separable).

***cis* isomer (CAS: 2095787-12-3)<sup>1,2</sup>**

$^1\text{H}$  NMR (400 MHz,  $\text{CDCl}_3$ ):  $\delta = 6.54$  (dd,  $J_1 = 3.2$  Hz,  $J_2 = 2.8$  Hz, 1H), 6.48 (d,  $J = 2.4$  Hz, 1H), 6.42 (d,  $J = 8.4$  Hz, 1H), 3.71 (s, 2H), 3.54-3.49 (m, 2H), 1.15 (d,  $J = 3.2$  Hz, 6H);  $^{13}\text{C}$  NMR (100 MHz,  $\text{CDCl}_3$ ):  $\delta = 133.76, 131.13, 122.93, 117.77, 114.88, 113.65, 48.89, 48.84, 17.21, 17.16$ .

***trans* isomer (CAS: 2095787-26-9)<sup>1,2</sup>**

$^1\text{H}$  NMR (400 MHz,  $\text{CDCl}_3$ ):  $\delta = 6.68$  (dd,  $J_1 = 2.0$  Hz,  $J_2 = 2.0$  Hz, 1H), 6.63 (d,  $J = 3.6$  Hz, 1H), 6.39 (d,  $J = 8.4$  Hz, 1H), 3.07-3.00 (m, 2H), 1.21 (d,  $J = 4.4$  Hz, 6H);  $^{13}\text{C}$  NMR (100 MHz,  $\text{CDCl}_3$ ):  $\delta = 134.85, 132.35, 120.72, 116.00, 114.84, 110.03, 51.84, 51.79, 29.70, 18.94$ .

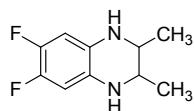

**6,7-Difluoro-2,3-dimethyl-1,2,3,4-tetrahydroquinoxaline (3g)**

Purified by flash column chromatography (PE: EA = 5:1), 78% yield (154 mg), white solid.

*cis/trans* = 79/21 (separable).

***cis* isomer:**  $^1\text{H}$  NMR (400 MHz,  $\text{CDCl}_3$ ):  $\delta = 6.46$  (dd,  $J_1 = 5.2$  Hz,  $J_2 = 5.2$  Hz, 1H), 6.30-6.24 (m, 1H), 3.54-3.47 (m, 2H), 1.16 (d,  $J = 6.4$  Hz, 6H);  $^{13}\text{C}$  NMR (100 MHz,  $\text{CDCl}_3$ ):  $\delta = 157.28$  (d,  $J = 233$  Hz, 1C), 133.90 (d,  $J = 10$  Hz, 1C), 127.76, 115.11 (d,  $J = 9.2$  Hz, 1C), 103.86 (d,  $J = 22.3$  Hz, 1C), 101.01 (d,  $J = 25.9$  Hz, 1C), 49.03, 48.87, 17.07, 16.86.

***trans* isomer:**  $^1\text{H}$  NMR (400 MHz,  $\text{CDCl}_3$ ):  $\delta = 6.33$  (t,  $J = 8.4$  Hz, 2H), 3.00 (s, 2H), 1.19 (d,  $J = 6.0$  Hz, 6H),  $^{13}\text{C}$  NMR (100 MHz,  $\text{CDCl}_3$ ):  $\delta = 144.22$  (d,  $J = 15$  Hz, 1C), 141.90 (d,  $J = 16$  Hz, 1C), 129.18, 102.39 (d,  $J = 8.4$  Hz, 1C), 102.29 (d,  $J = 8.4$  Hz, 1C), 51.87, 18.87.

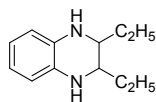

**2,3-Diethyl-1,2,3,4-tetrahydroquinoxaline (3h)**

Purified by flash column chromatography (PE: EA = 5:1), 76% yield (144 mg), yellow solid.

*cis/trans* = 0/100 (*cis* isomer was not detected).

**2,3-Diethyl-1,2,3,4-tetrahydroquinoxaline (5f)**

Purified by flash column chromatography (PE: EA = 5:1), 74% yield (141 mg), yellow solid.

*cis/trans* = 0/100 (*cis* isomer was not detected).

***trans*-2,3-Diethyl-1,2,3,4-tetrahydroquinoxaline (CAS: 2095787-23-6)**<sup>3</sup>

<sup>1</sup>H NMR (400 MHz, CDCl<sub>3</sub>):  $\delta$  = 6.62 (dd,  $J$  = 3.2 Hz, 2H), 6.54 (dd,  $J$  = 3.2 Hz, 2H), 3.78 (s, 2H), 3.30 (dd,  $J_1$  = 6.4 Hz,  $J_2$  = 2.4 Hz, 2H), 1.50 (t,  $J$  = 7.2 Hz, 4H), 1.02 (t,  $J$  = 7.2 Hz, 6H); <sup>13</sup>C NMR (100 MHz, CDCl<sub>3</sub>):  $\delta$  = 132.90, 118.45, 114.31, 54.61, 23.01, 10.50 .

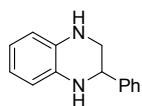

**2-Phenyl-1,2,3,4-tetrahydroquinoxaline (3i)**<sup>1, 2</sup>

Purified by flash column chromatography (PE: EA = 10:1), 75% yield (157 mg), yellow solid.

CAS: 5021-47-6. <sup>1</sup>H NMR (400 MHz, CDCl<sub>3</sub>):  $\delta$  = 7.45-7.34 (m, 5H), 6.70-6.67 (m, 2H), 6.65-6.61 (m, 2H), 4.53 (dd,  $J_1$  = 3.2 Hz,  $J_2$  = 2.8 Hz, 1H), 3.39 (s, 1H), 3.50 (dd,  $J$  = 3.2 Hz, 1H), 3.37 (dd,  $J_1$  = 8.0 Hz,  $J_2$  = 8.4 Hz, 1H); <sup>13</sup>C NMR (100 MHz, CDCl<sub>3</sub>):  $\delta$  = 141.84, 134.18, 132.70, 128.67, 127.94, 127.92, 127.03, 127.00, 119.03, 118.81, 114.81, 114.48, 54.76, 49.16.

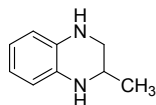

**2-Methyl-1,2,3,4-tetrahydroquinoxaline (3j)**<sup>1, 2</sup>

Purified by flash column chromatography (PE: EA = 5:1), 81% yield (119 mg), yellow solid.

CAS: 6640-55-7. <sup>1</sup>H NMR (400 MHz, CDCl<sub>3</sub>):  $\delta$  = 6.65 (dd,  $J_1$  = 3.2 Hz,  $J_2$  = 3.6 Hz, 2H), 6.56 (dd,  $J_1$  = 2.8 Hz,  $J_2$  = 2.8 Hz, 2H), 3.58-3.34 (m, 4H), 3.08 (dd,  $J_1$  = 2.8 Hz,  $J_2$  = 2.8 Hz, 1H), 1.23 (d,  $J$  = 7.2 Hz, 3H), <sup>13</sup>C NMR (100 MHz, CDCl<sub>3</sub>):  $\delta$  = 133.62, 133.25, 118.71, 114.53, 114.48, 48.28, 45.74, 19.96.

## References

- [1] Qin, J.; Chen, F.; Ding, Z.; He, Y. M.; Xu, L.; Fan, Q. H., *Org. Lett.*, **2011**, *13*, 6568.
- [2] Murata, S.; Sugimoto, T.; Matsuura, S. *Heterocycles*, **1987**, *26*, 763
- [3] Shi, F.; Tan, W.; Zhang, H. H.; Li, M.; Q. Ye, G.; Ma, H.; Tu, S. J.; Li, G., *Adv. Synth. Catal.*, **2013**, *355*, 3715.
- [4] George, H. F.; Harry, P. S. *J. Org. Chem.*, **1974**, *39*, 635.
- [5] Li, S. L.; Meng, W.; Du, H.F., *Org. Lett.*, **2017**, *19*, 2604.



#### 4. $^1\text{H}$ NMR & $^{13}\text{C}$ NMR Spectra of the Products

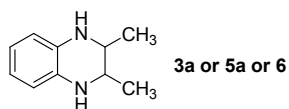

*cis/trans* of **3a** = 70/30 determined by  $^1\text{H}$  NMR of the crude product

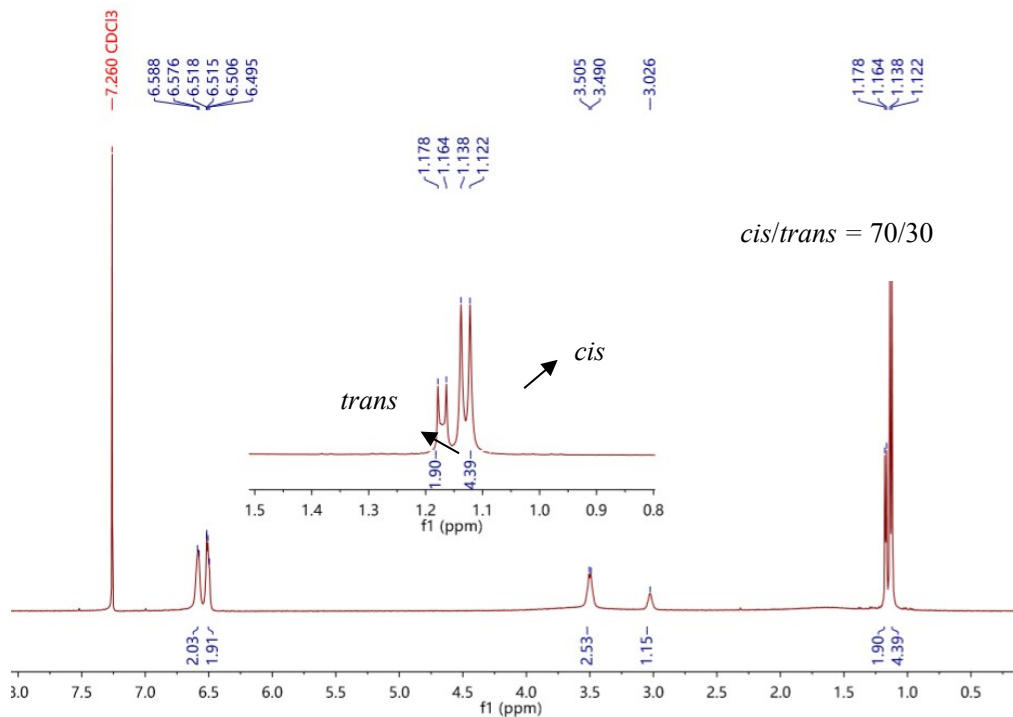

*cis/trans* of **5a** = 83/17 determined by  $^1\text{H}$  NMR of the crude product

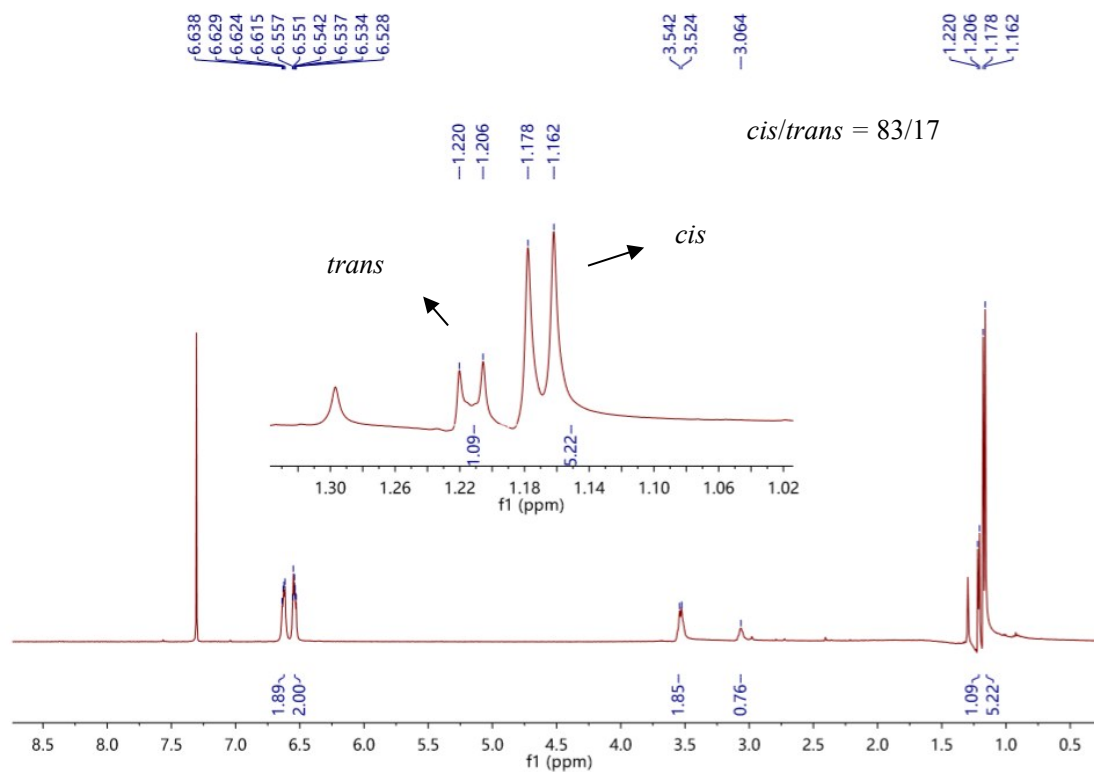

*cis/trans* of **6** = 68/32 determined by <sup>1</sup>H NMR of the crude product

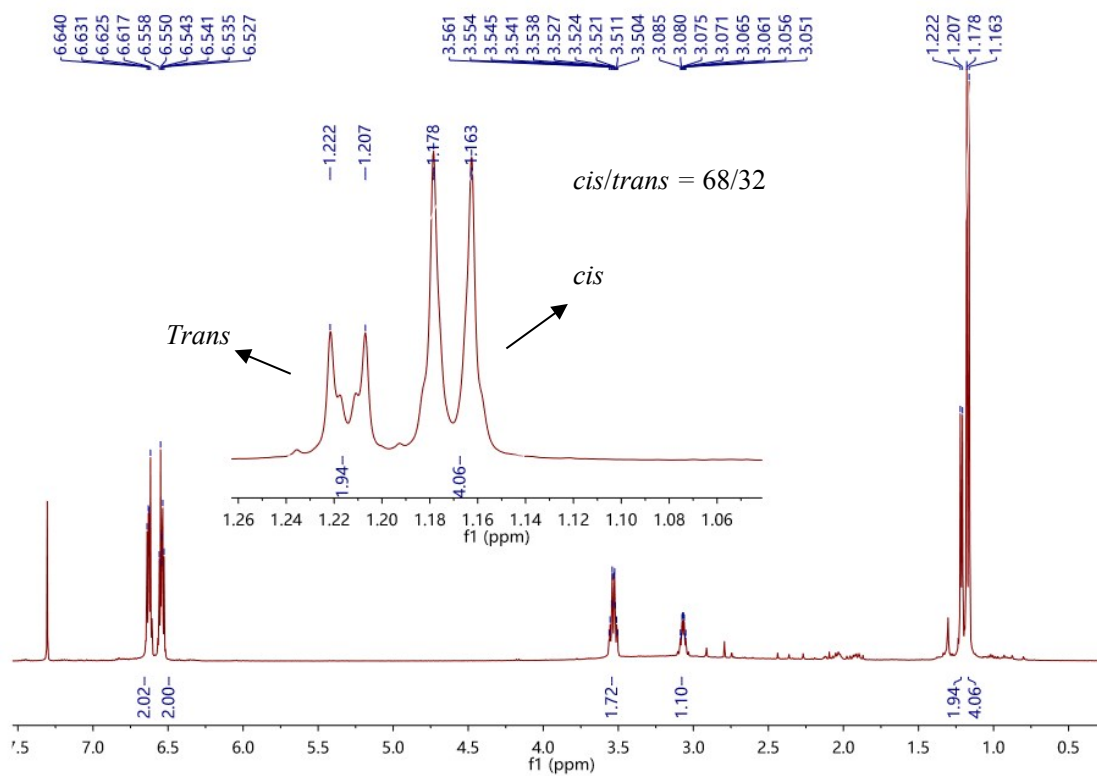

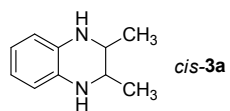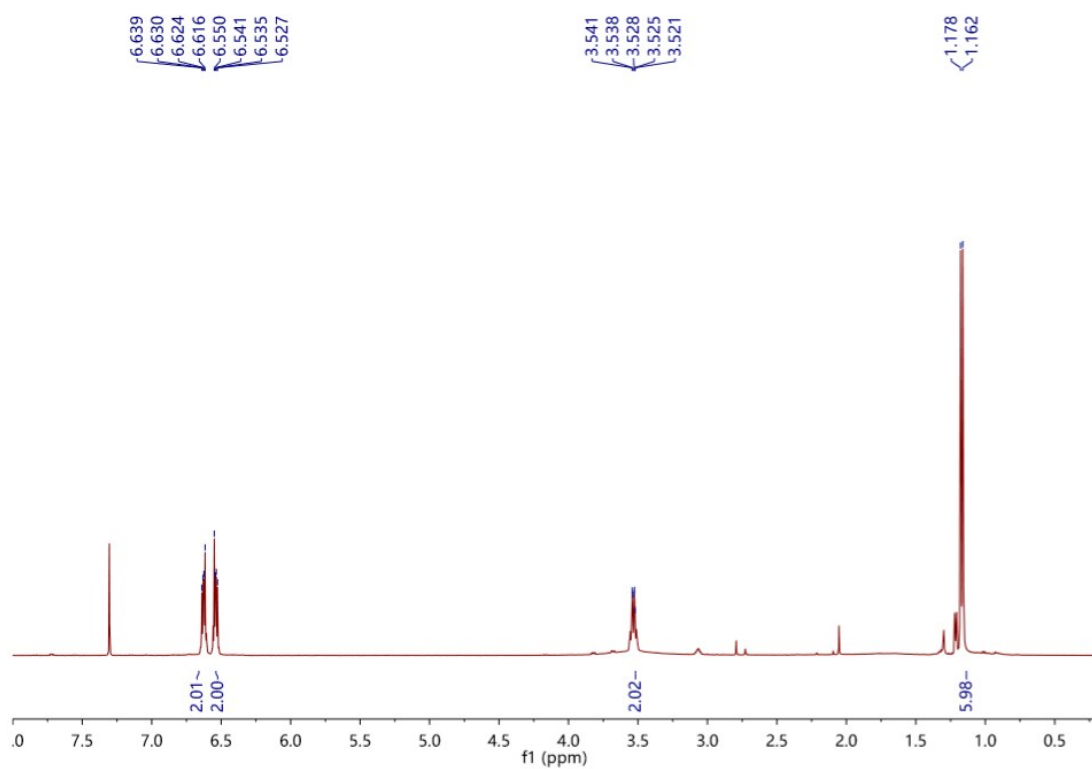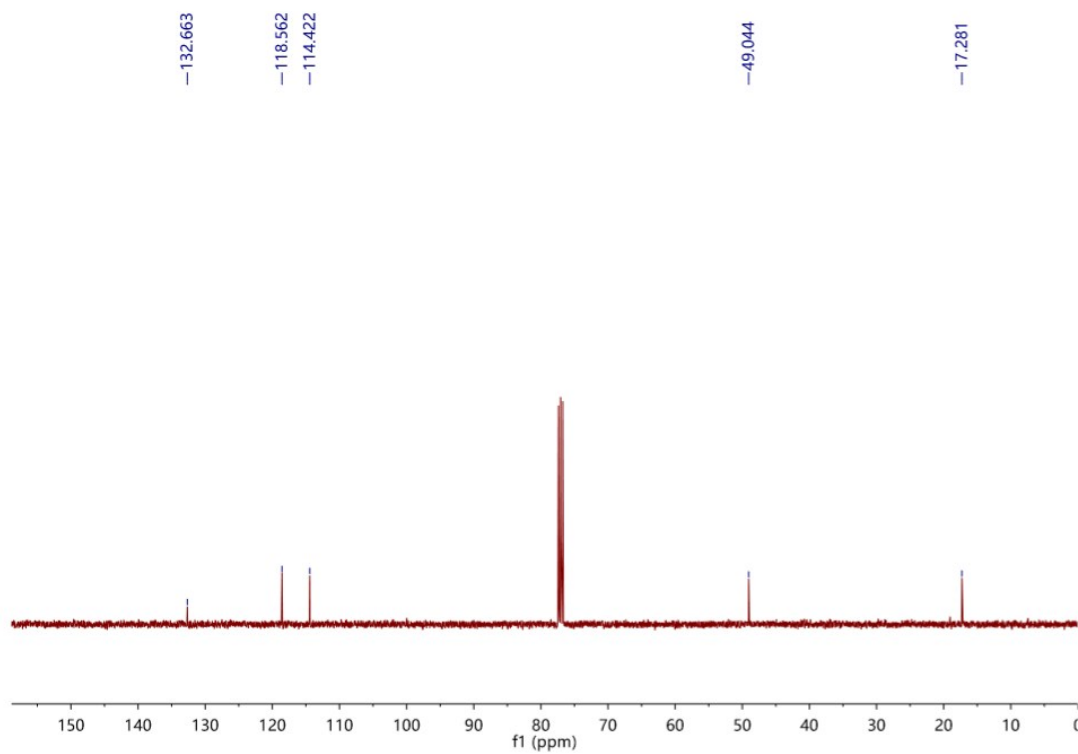

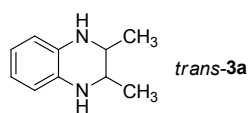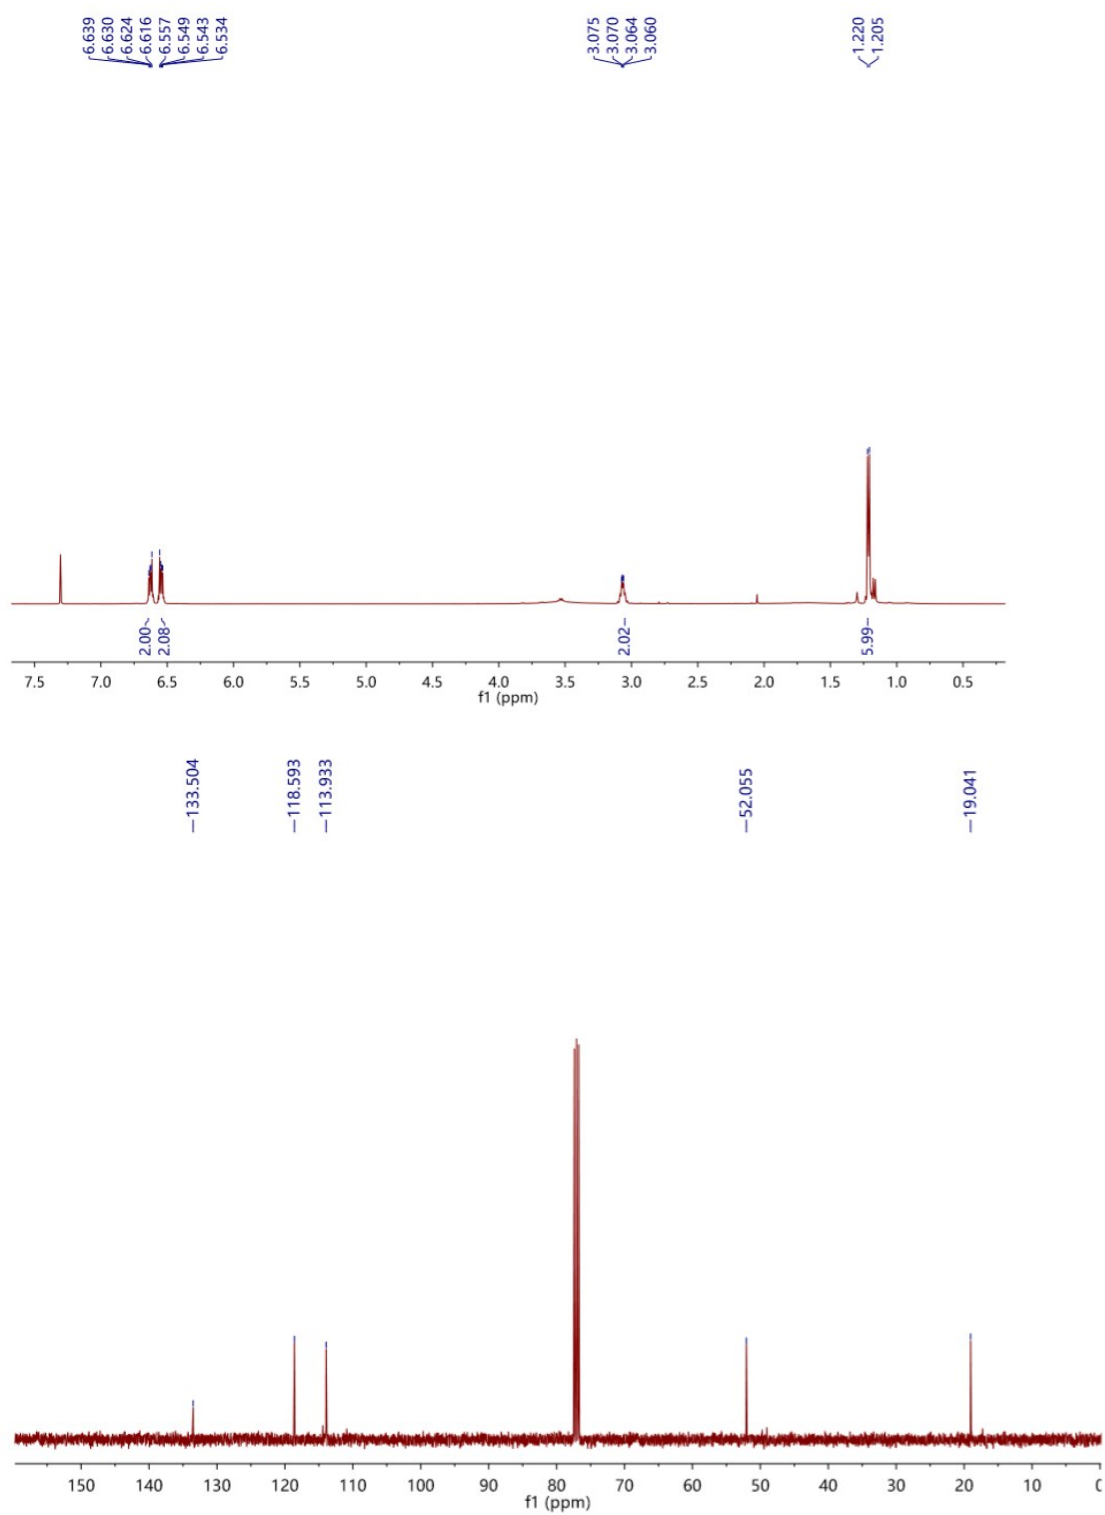

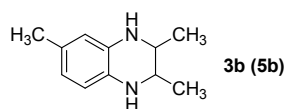

*cis/trans* of **3b** = 65/35 determined by <sup>1</sup>H NMR of the crude product.

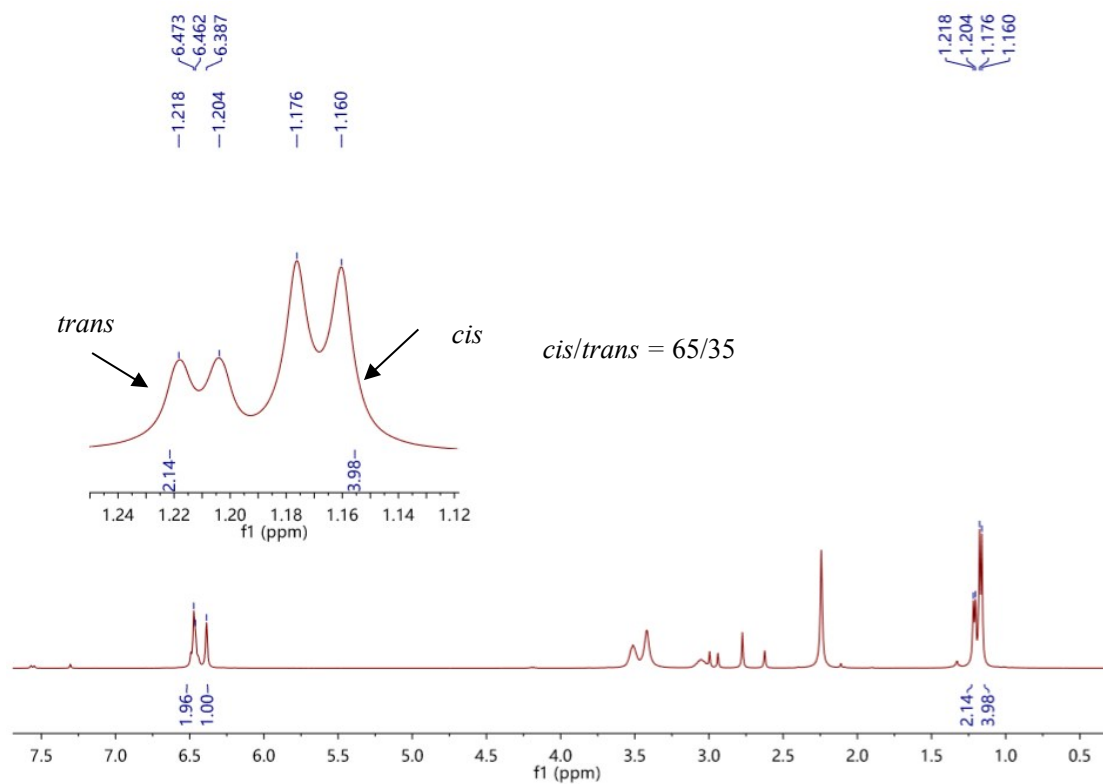

*cis/trans* of **5b** = 67/33 determined by <sup>1</sup>H NMR of the crude product.

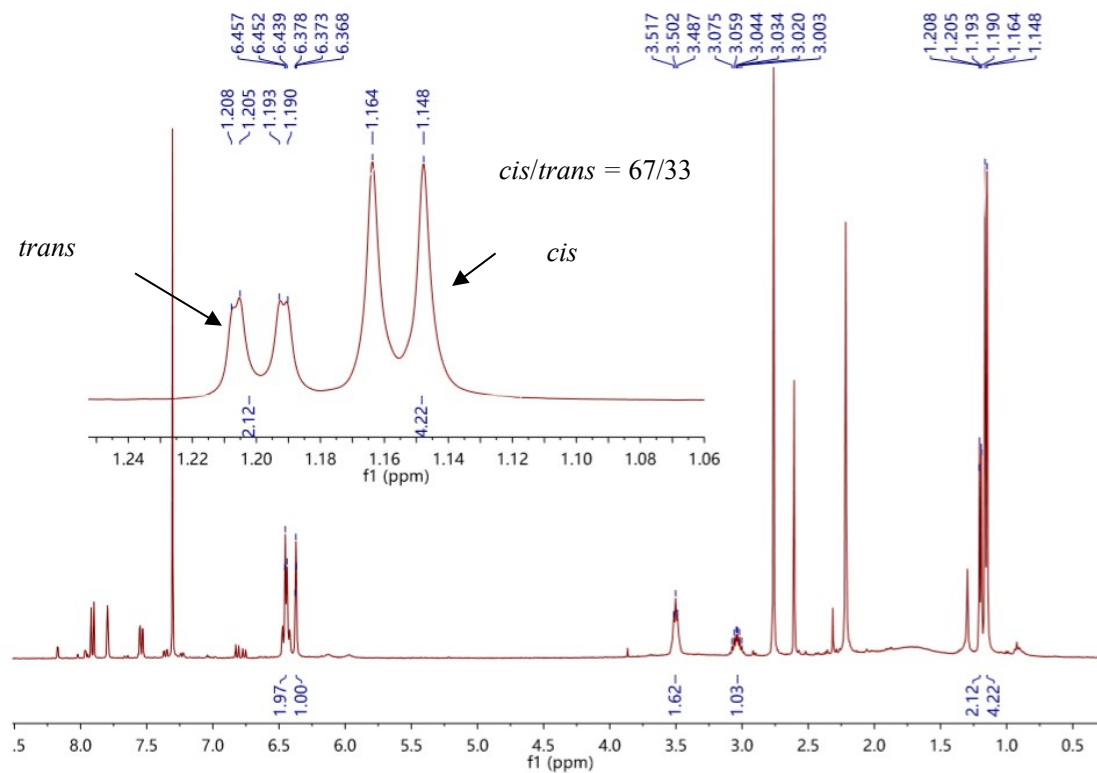

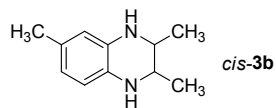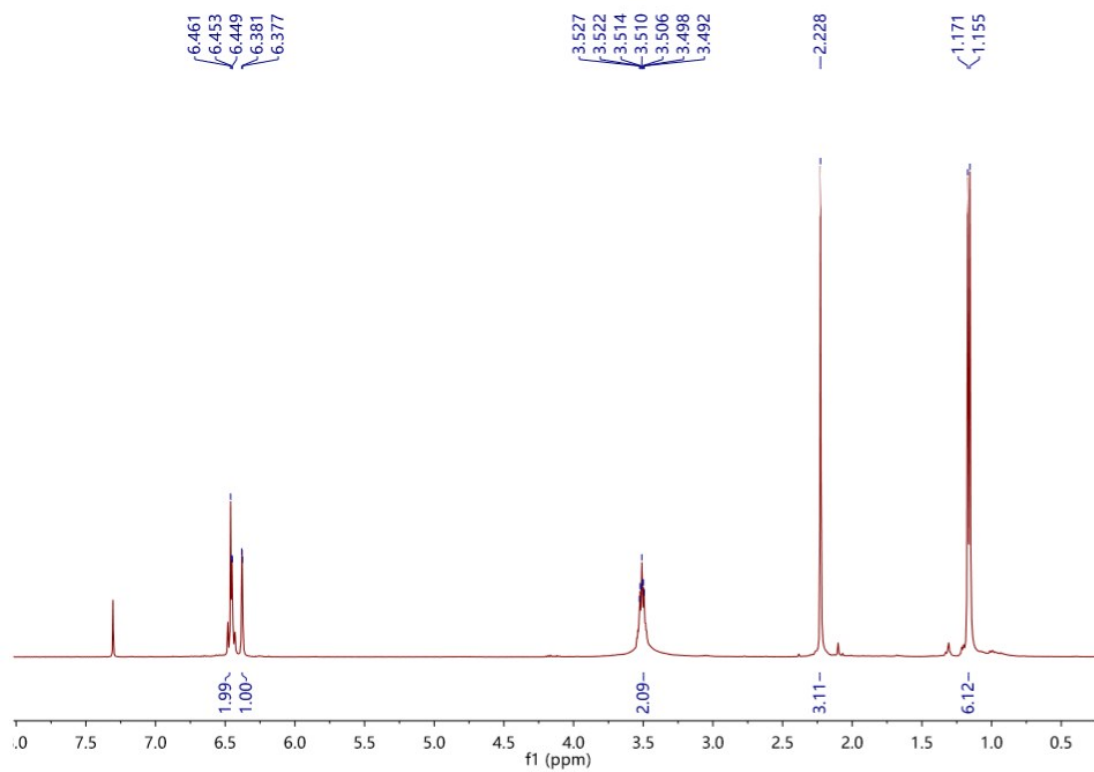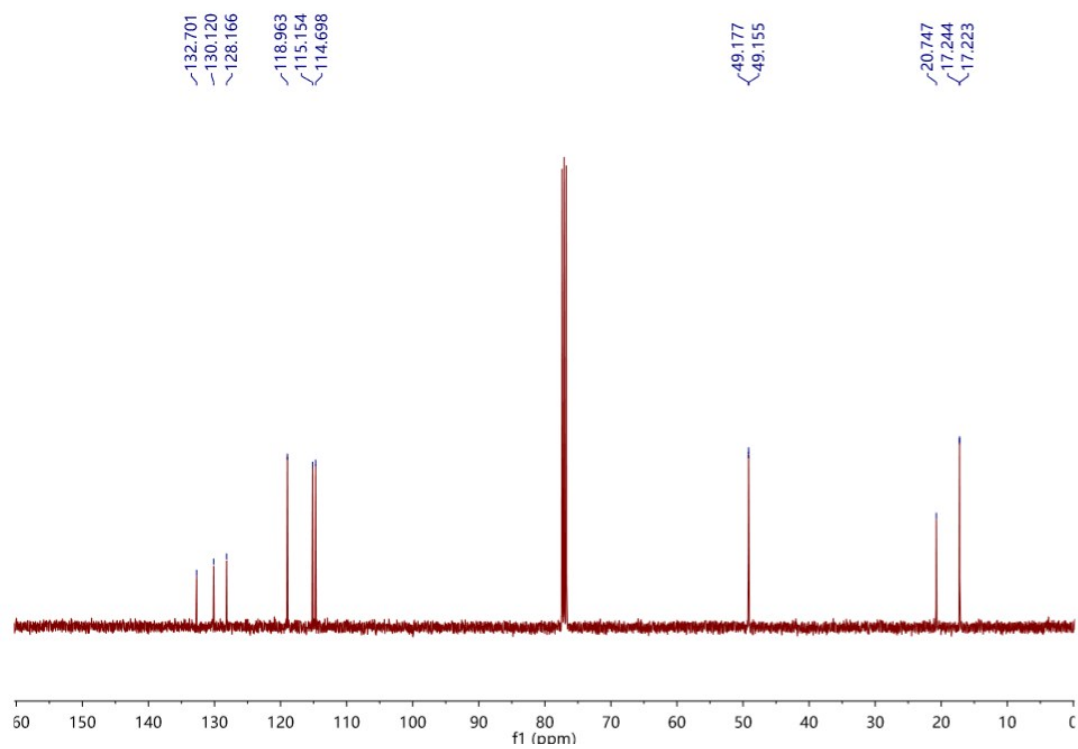

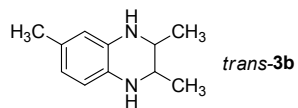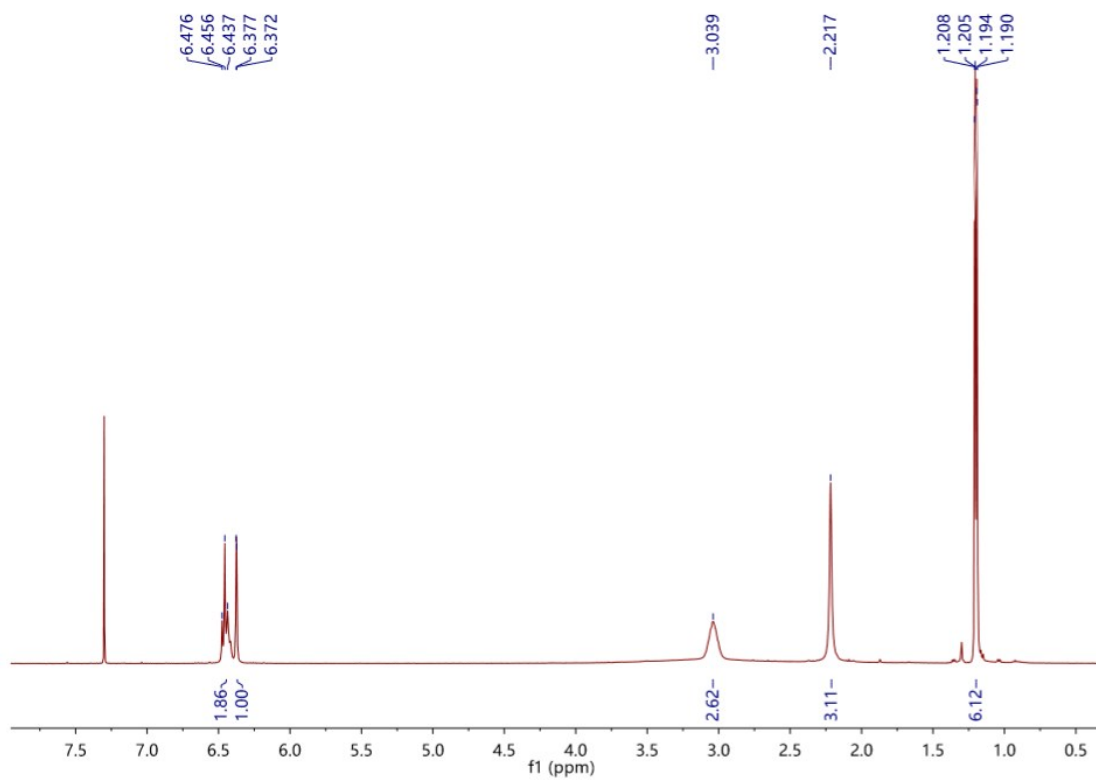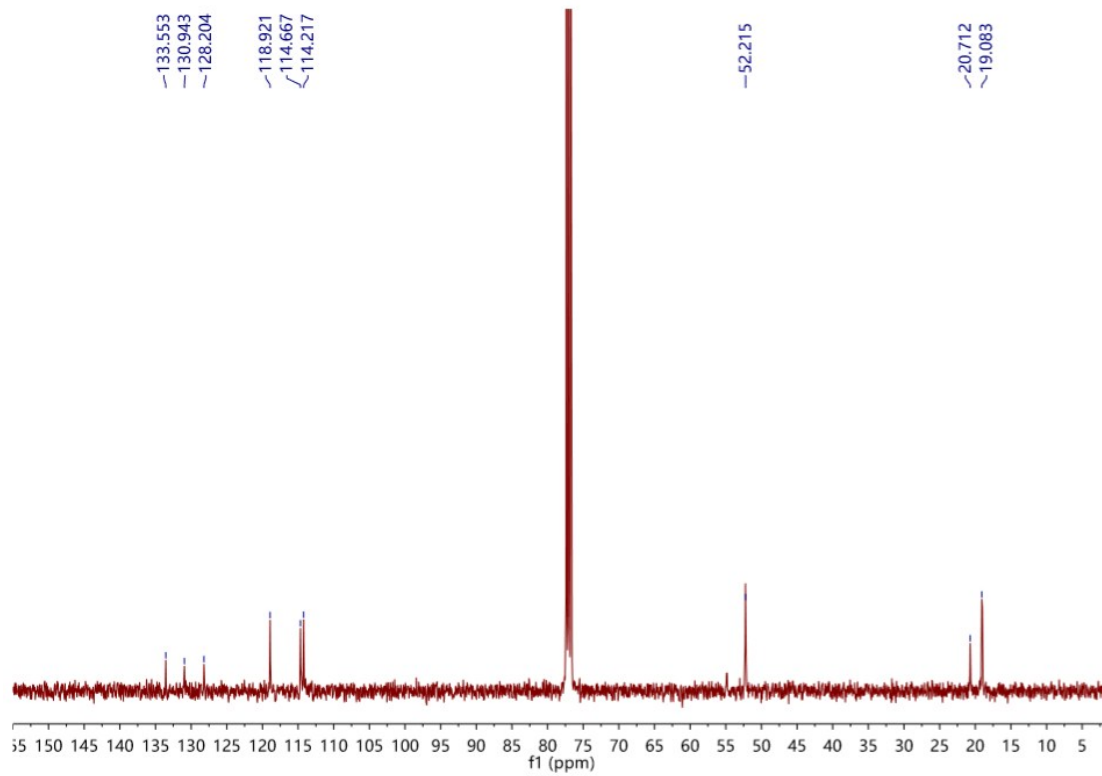

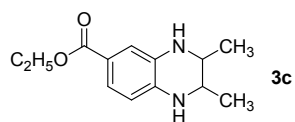

*cis/trans* of **3c** = 69/31 determined by <sup>1</sup>H NMR of the crude product.

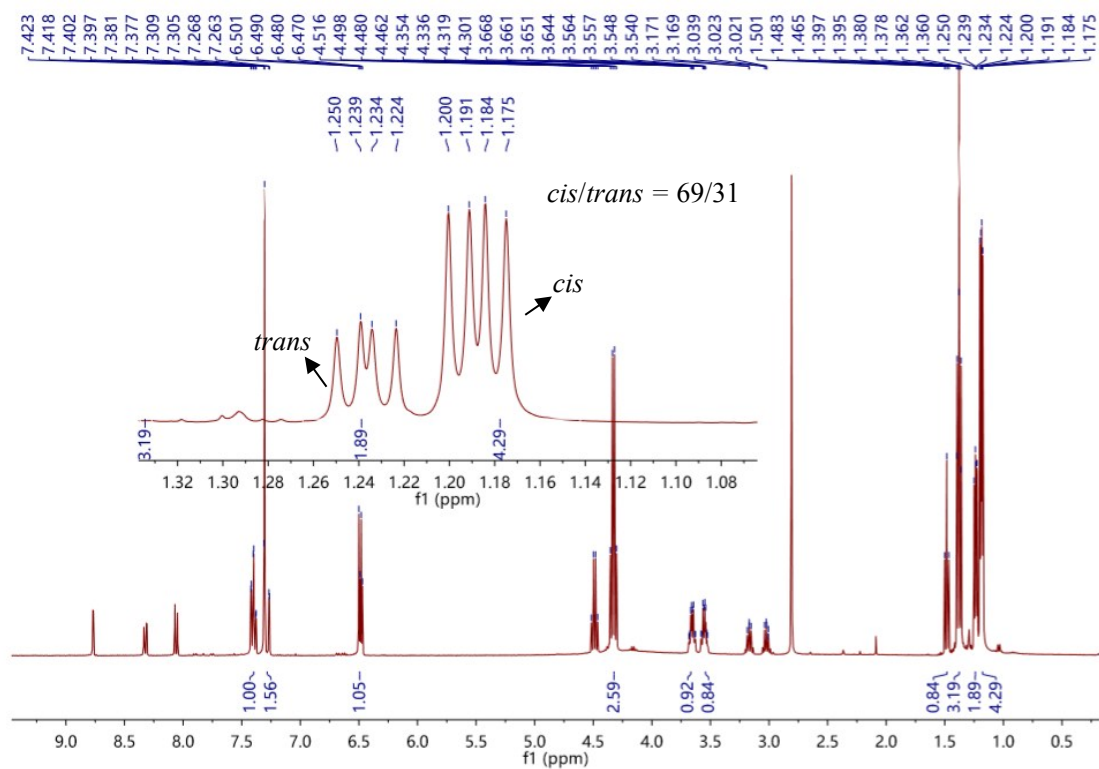



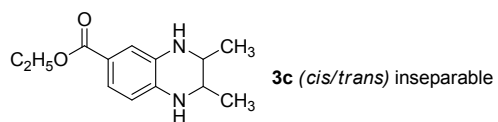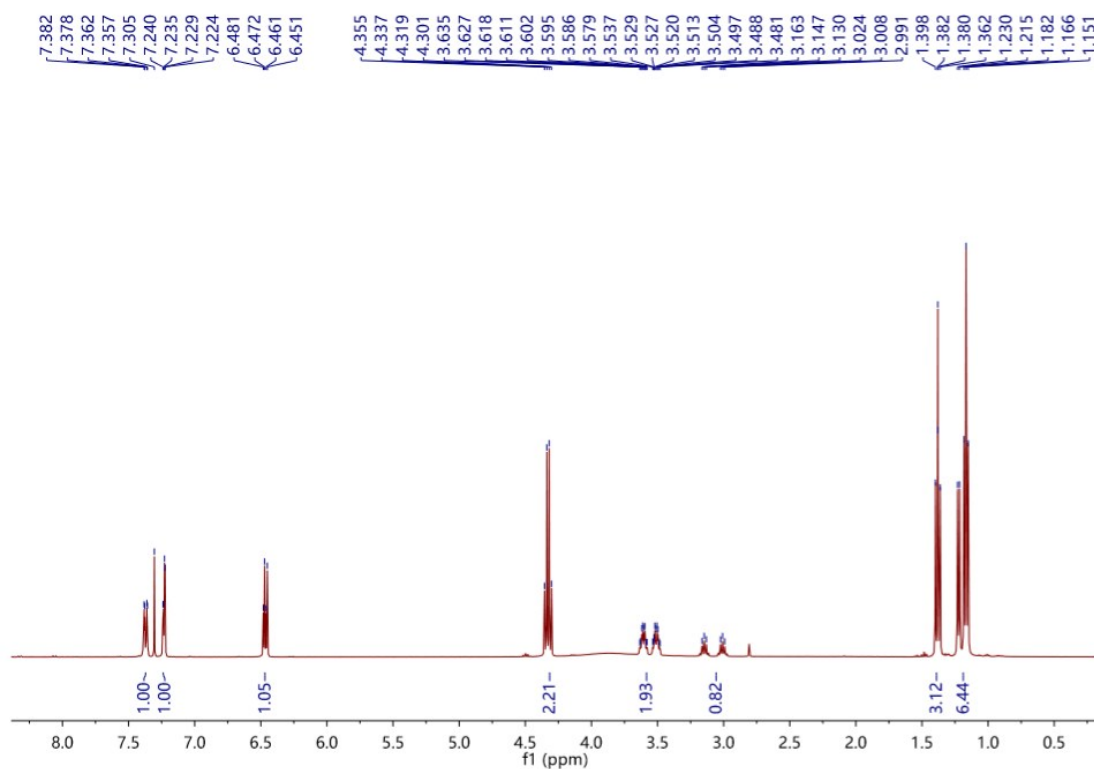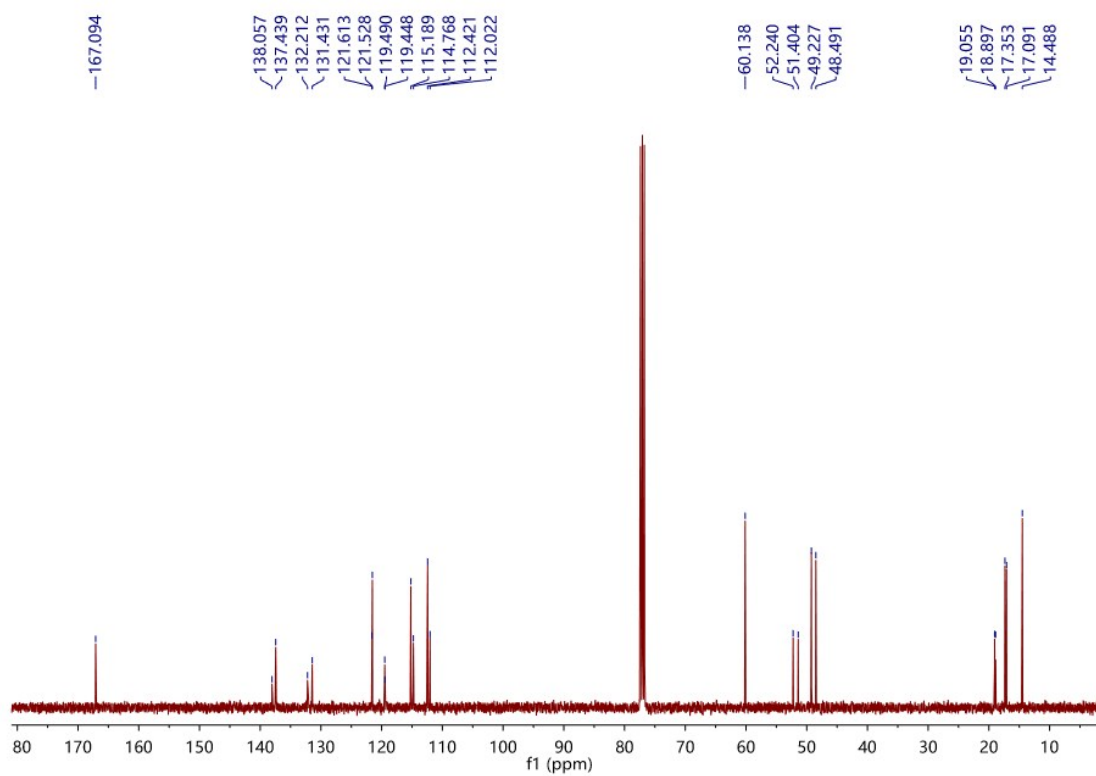

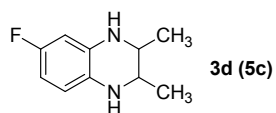

*cis/trans* of **3d** = 56/44 determined by <sup>1</sup>H NMR of the crude product.

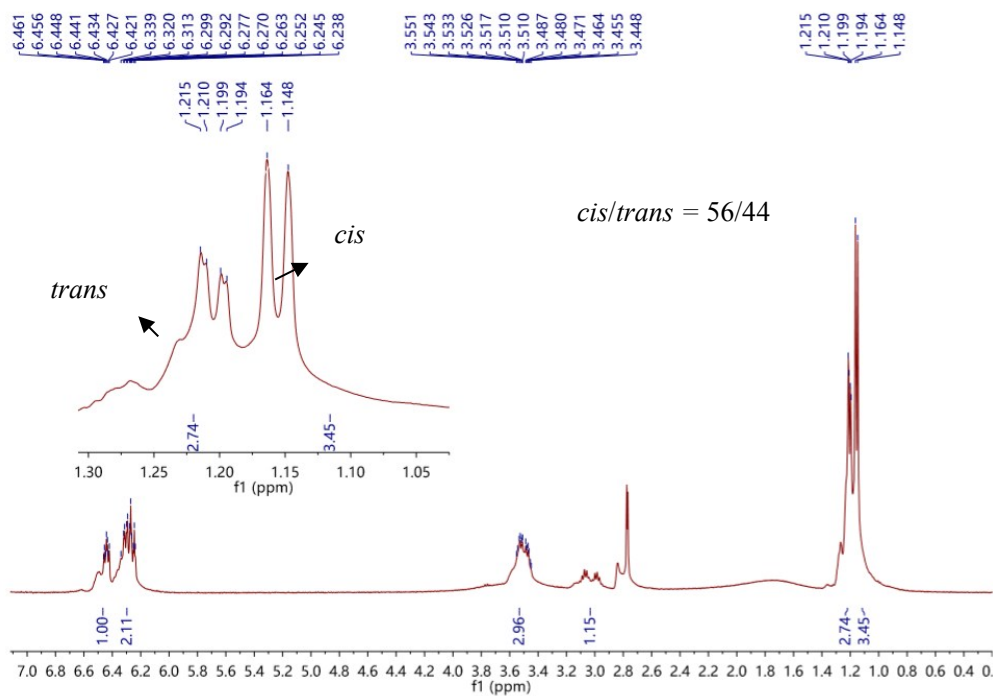

*cis/trans* of **5c** = 67/33 determined by <sup>1</sup>H NMR of the crude product.

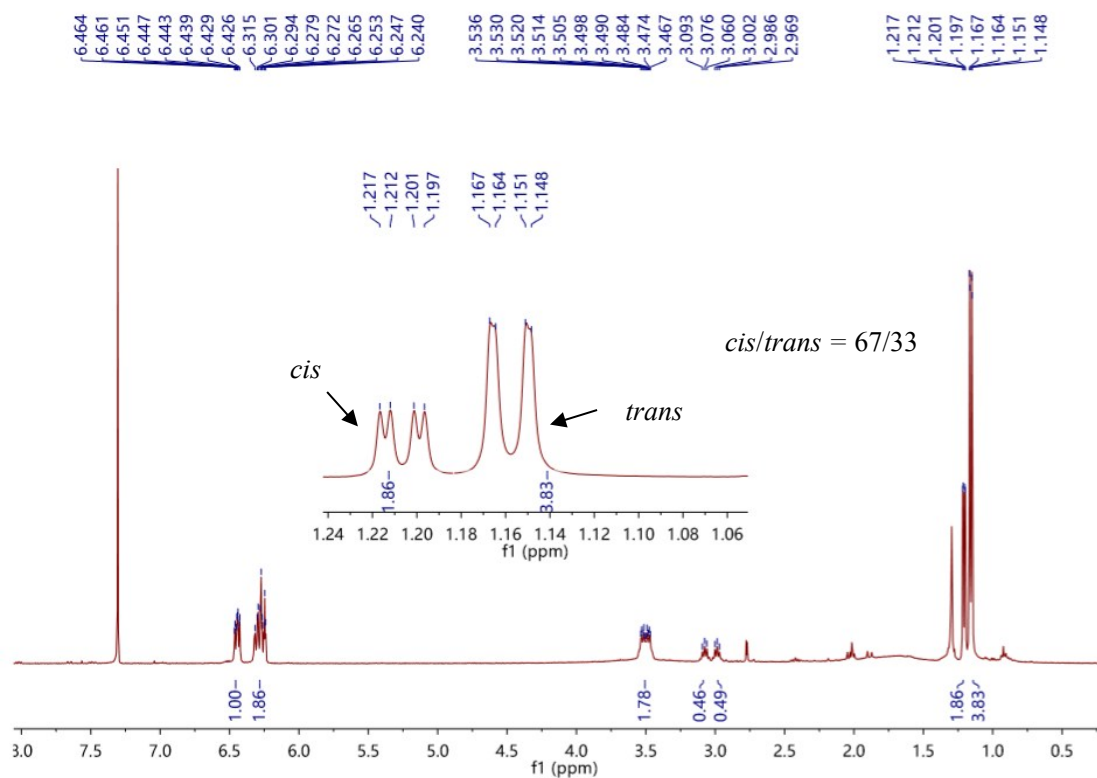

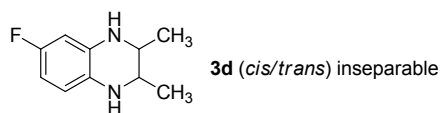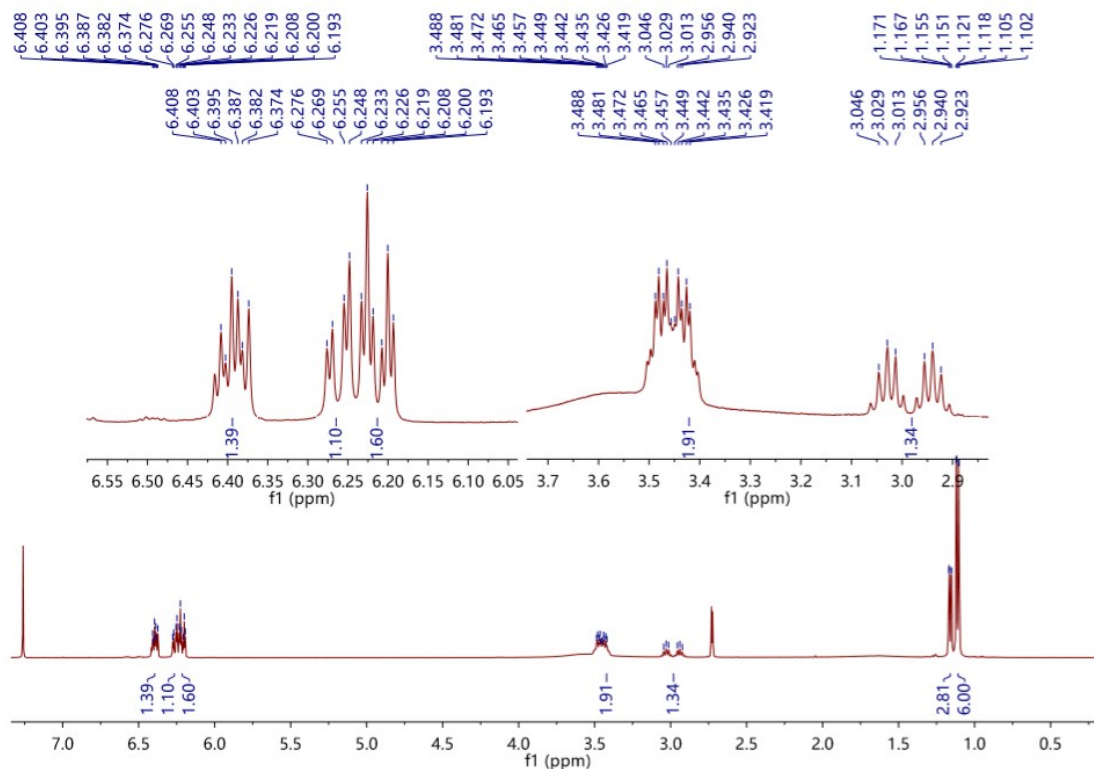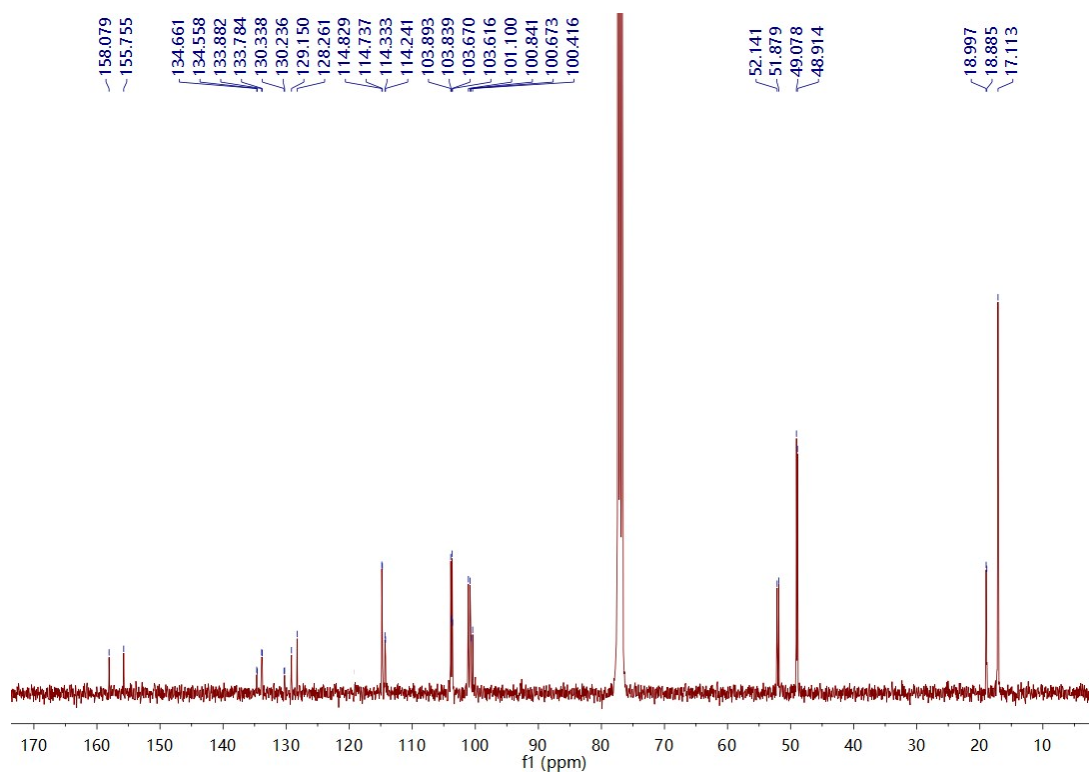

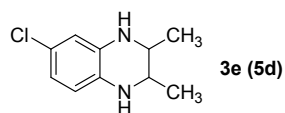

*cis/trans* of **3e** = 66/34 determined by  $^1\text{H}$  NMR of the crude product.

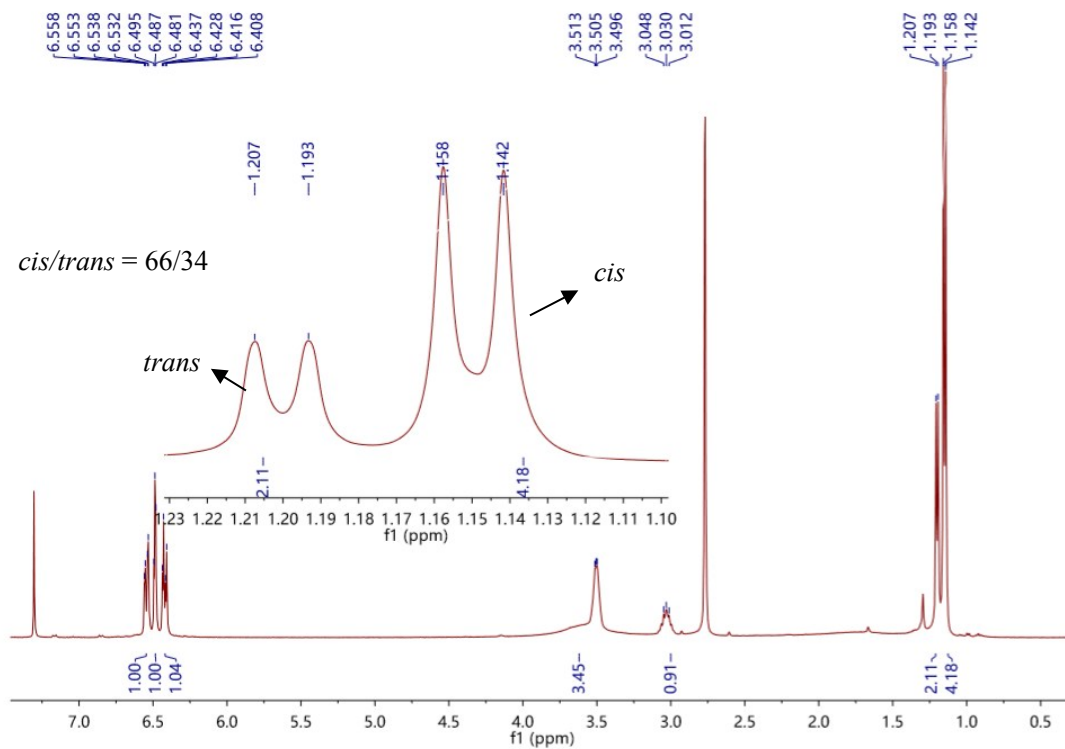

*cis/trans* of **5d** = 63/37 determined by  $^1\text{H}$  NMR of the crude product.

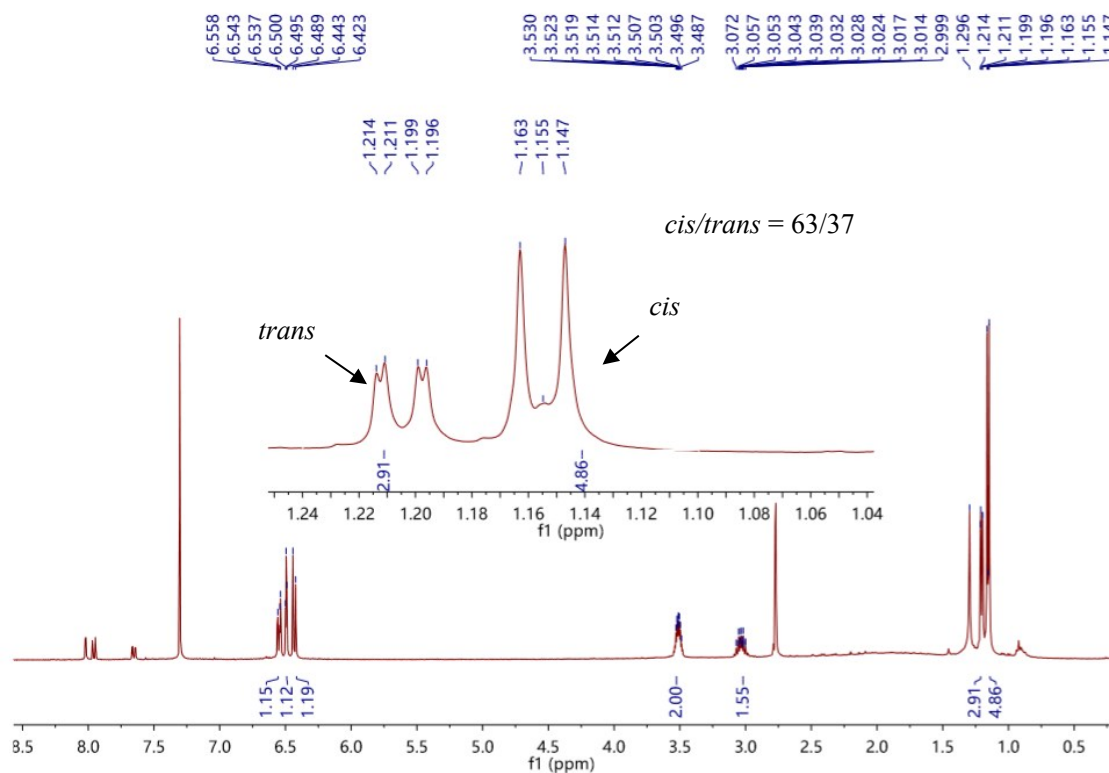

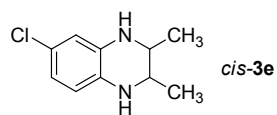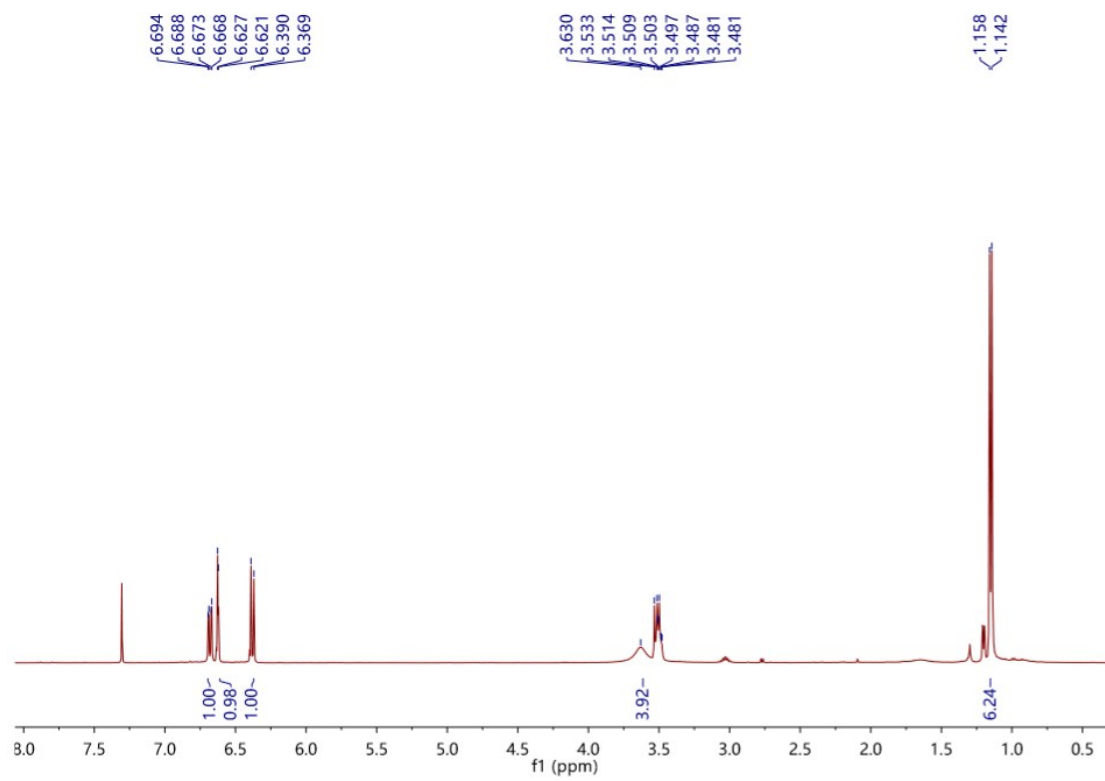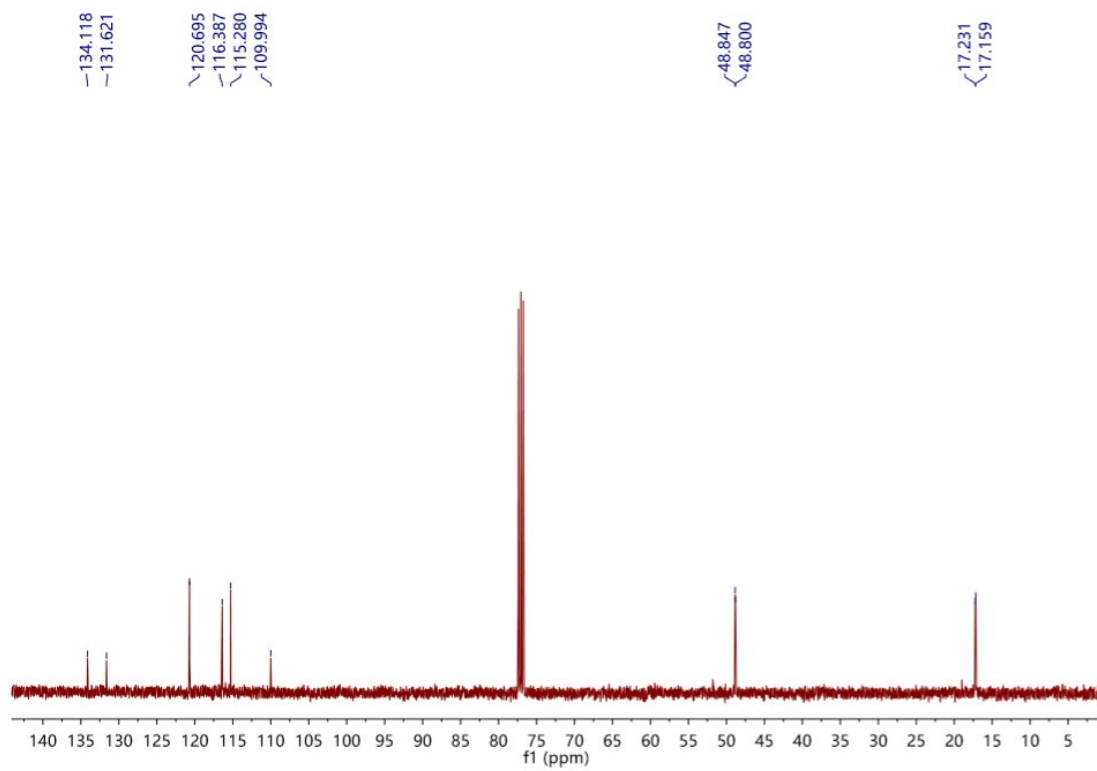

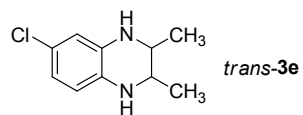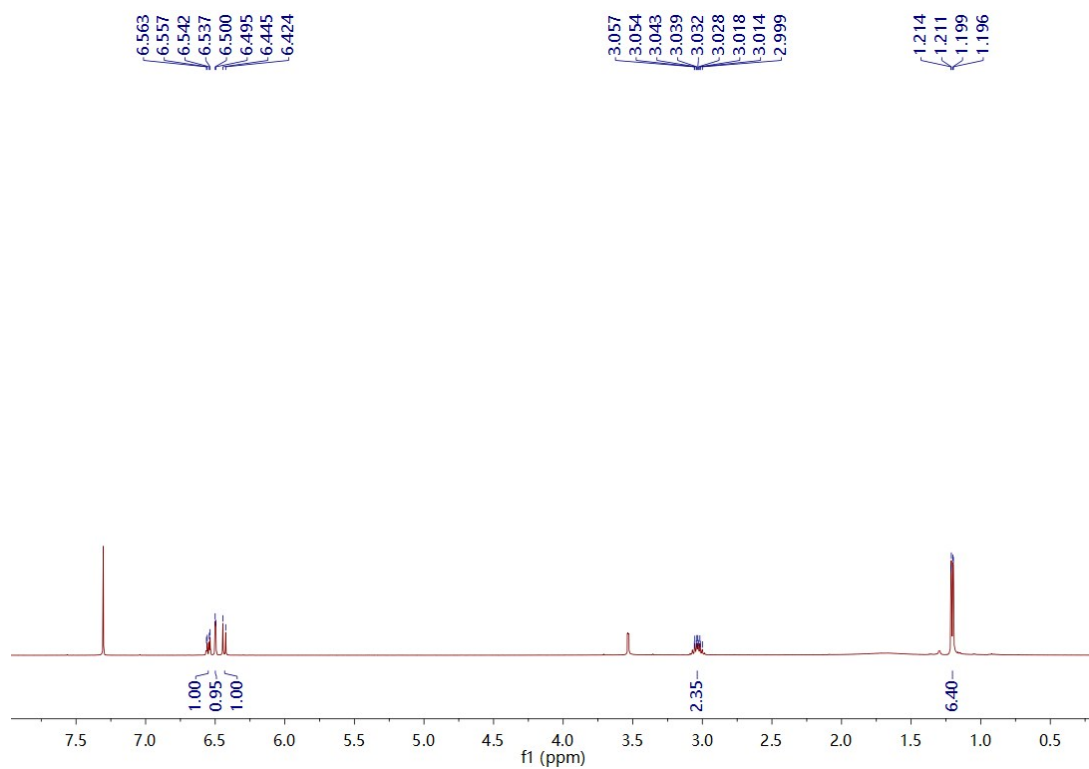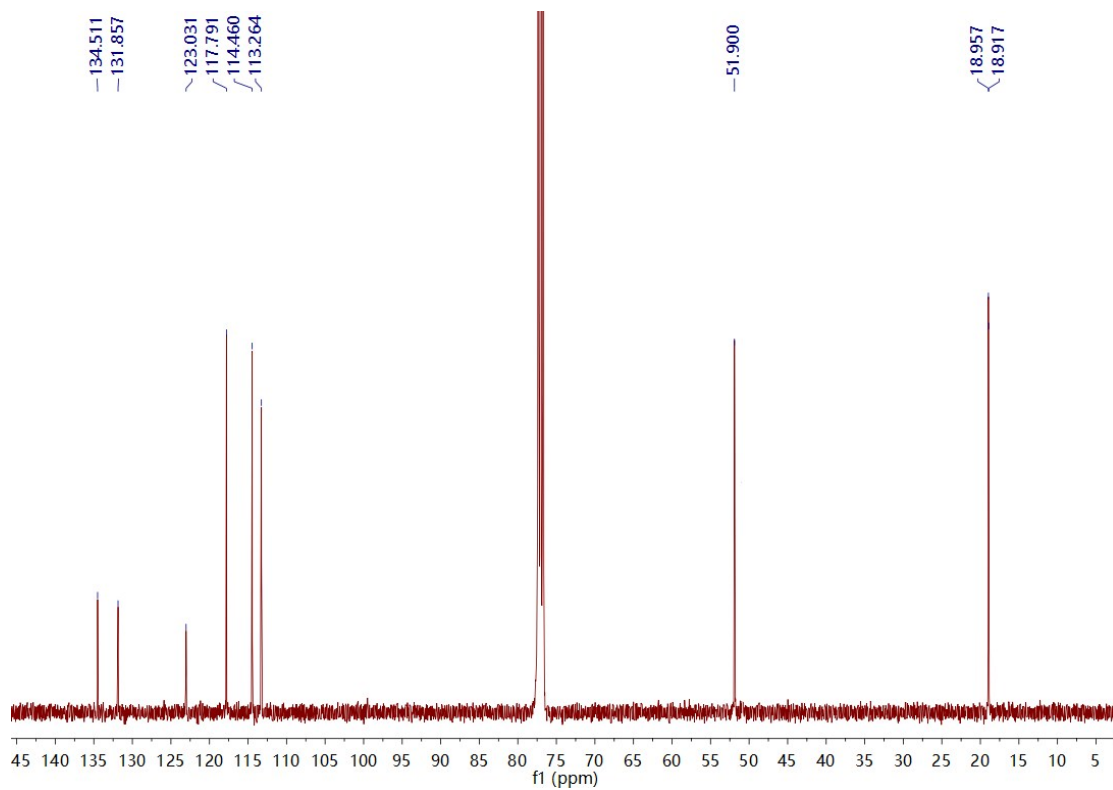

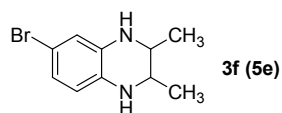

*cis/trans* of **3f** = 62/38 determined by <sup>1</sup>H NMR of the crude product.

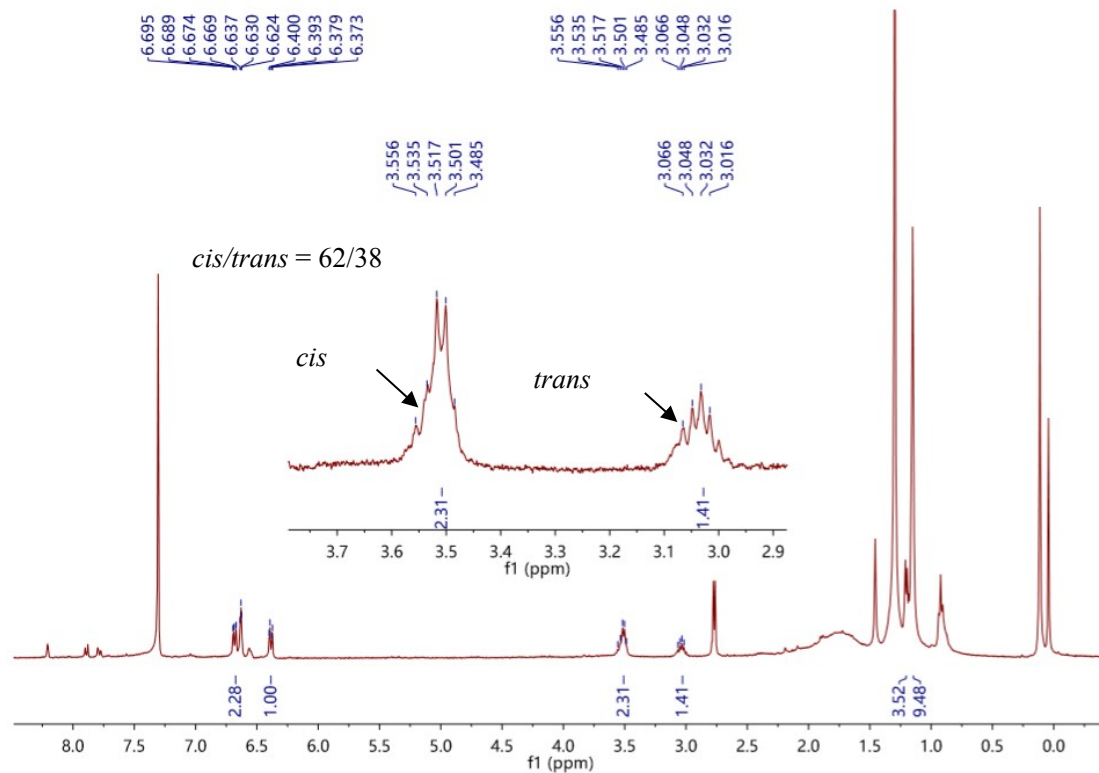

*cis/trans* of **5e** = 64/36 determined by <sup>1</sup>H NMR of the crude product.

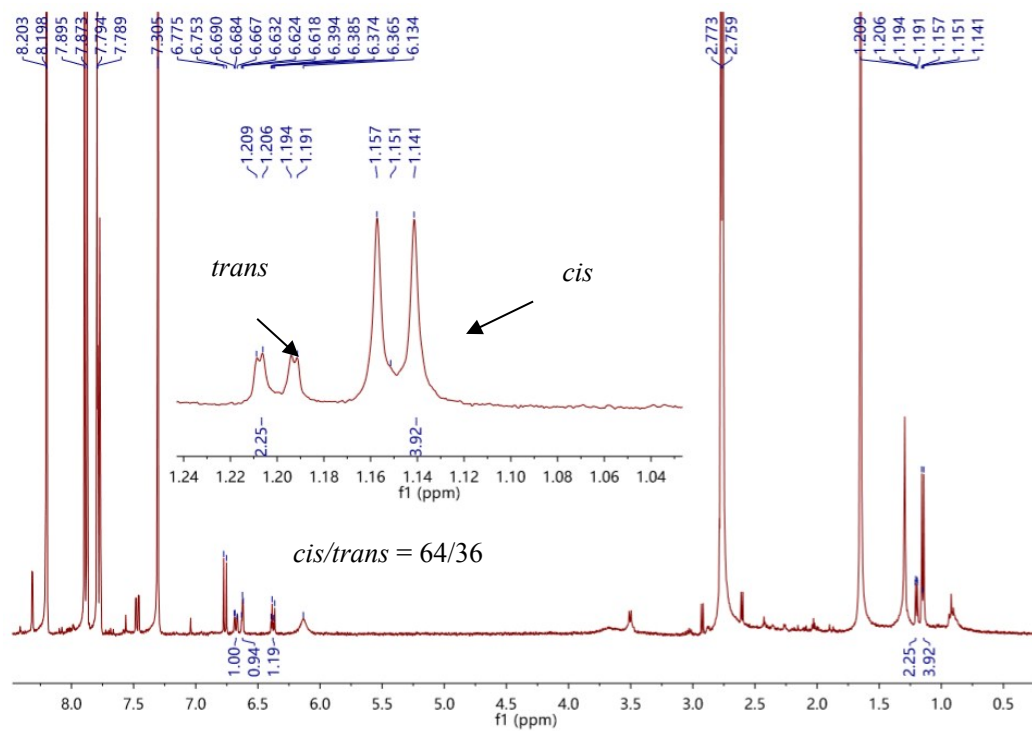

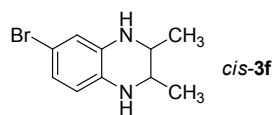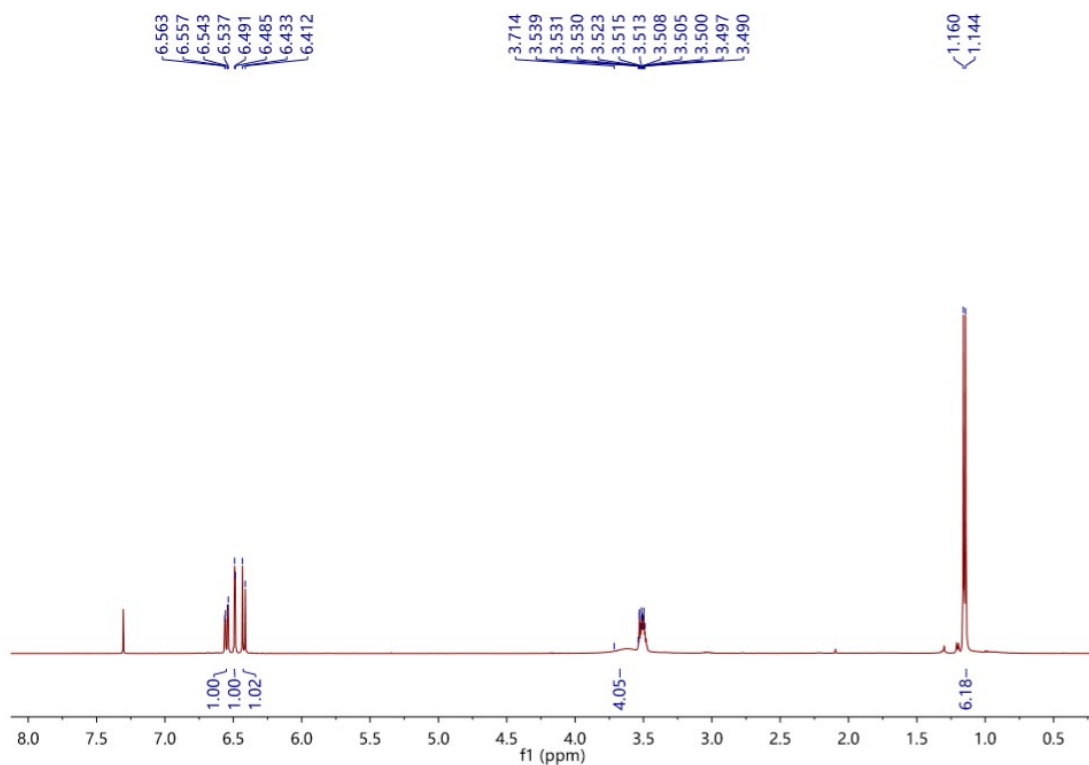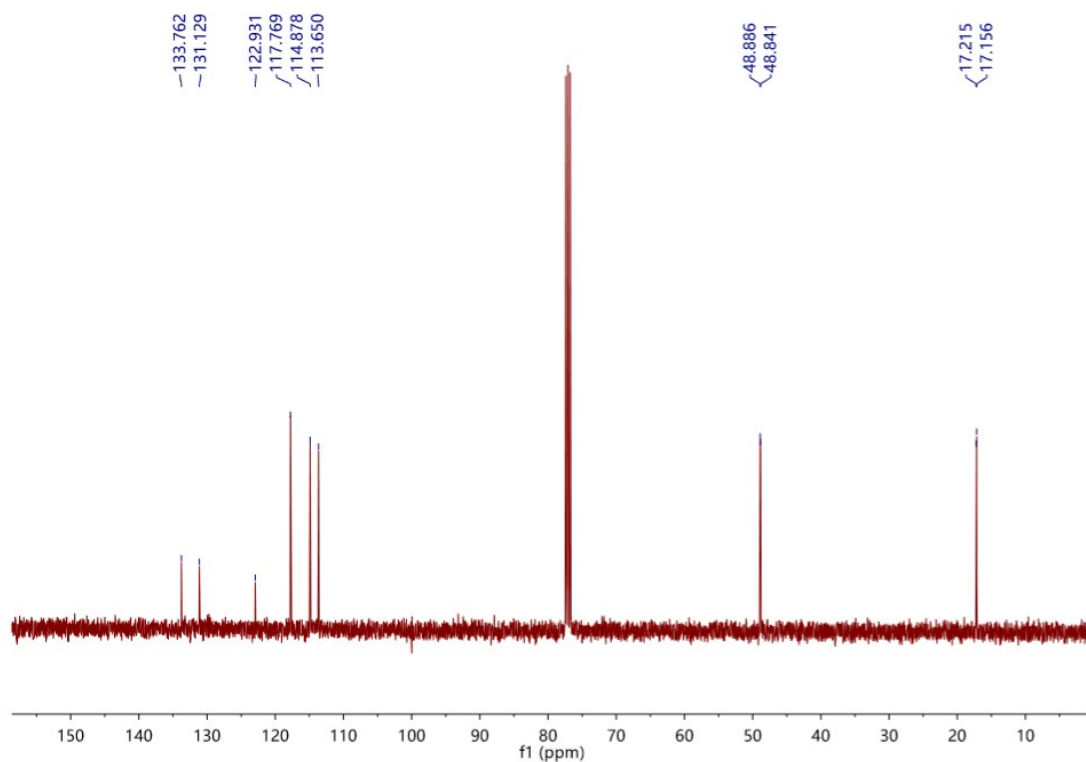



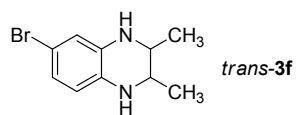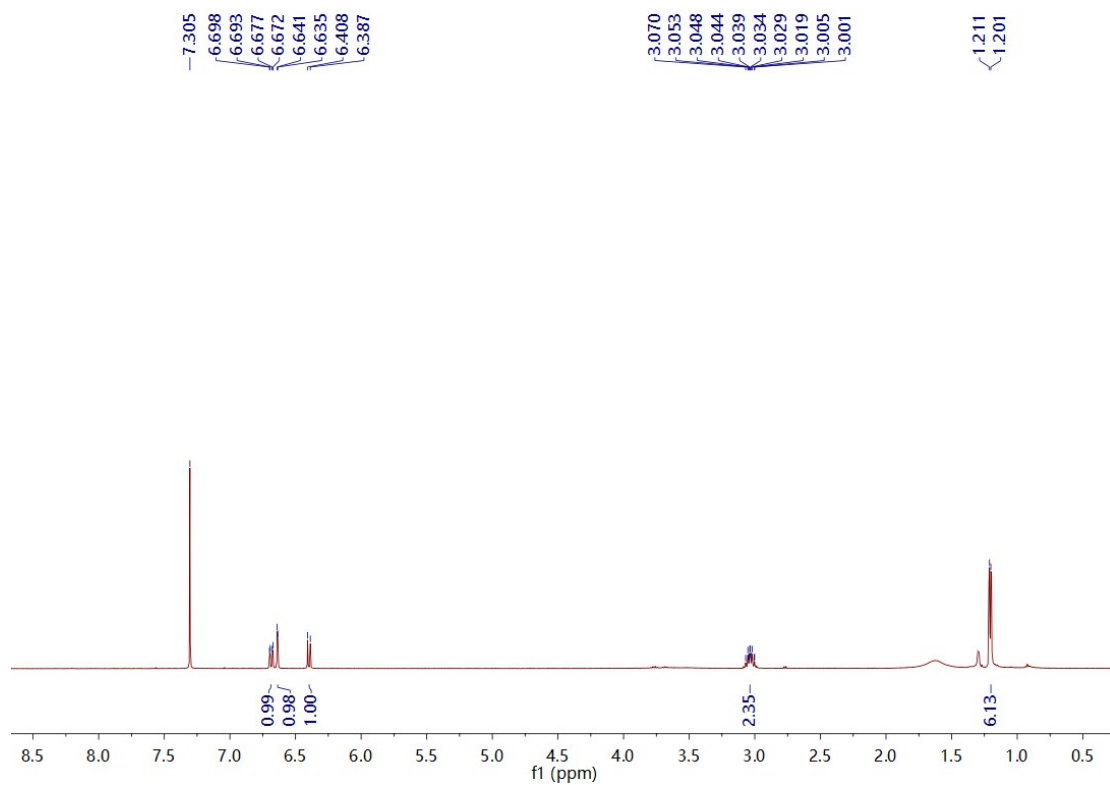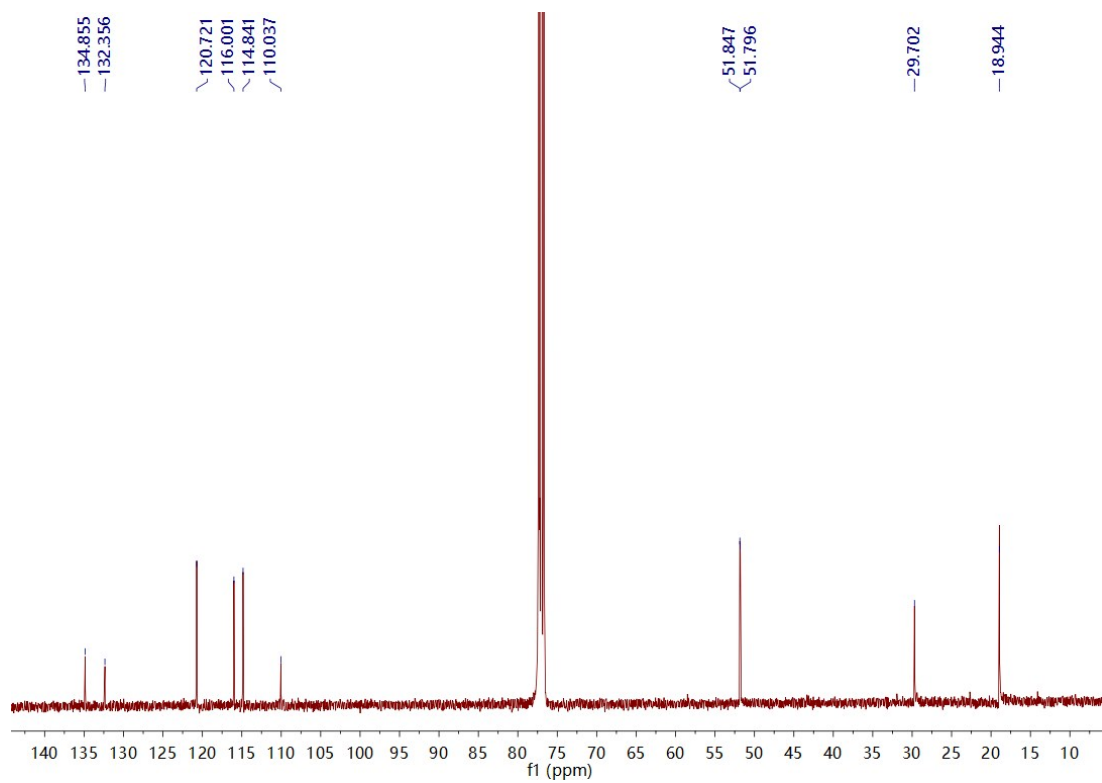

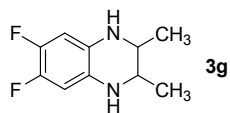

*cis/trans* of **3g** = 79/21 determined by <sup>1</sup>H NMR of the crude product.

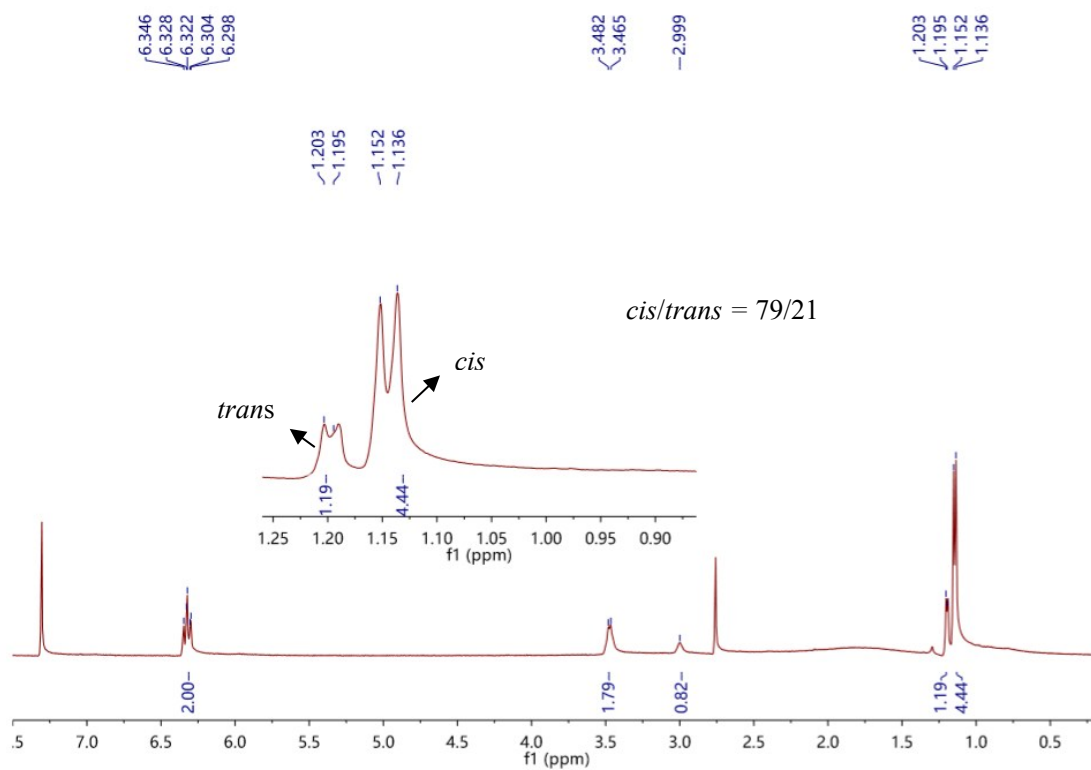

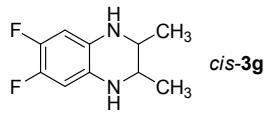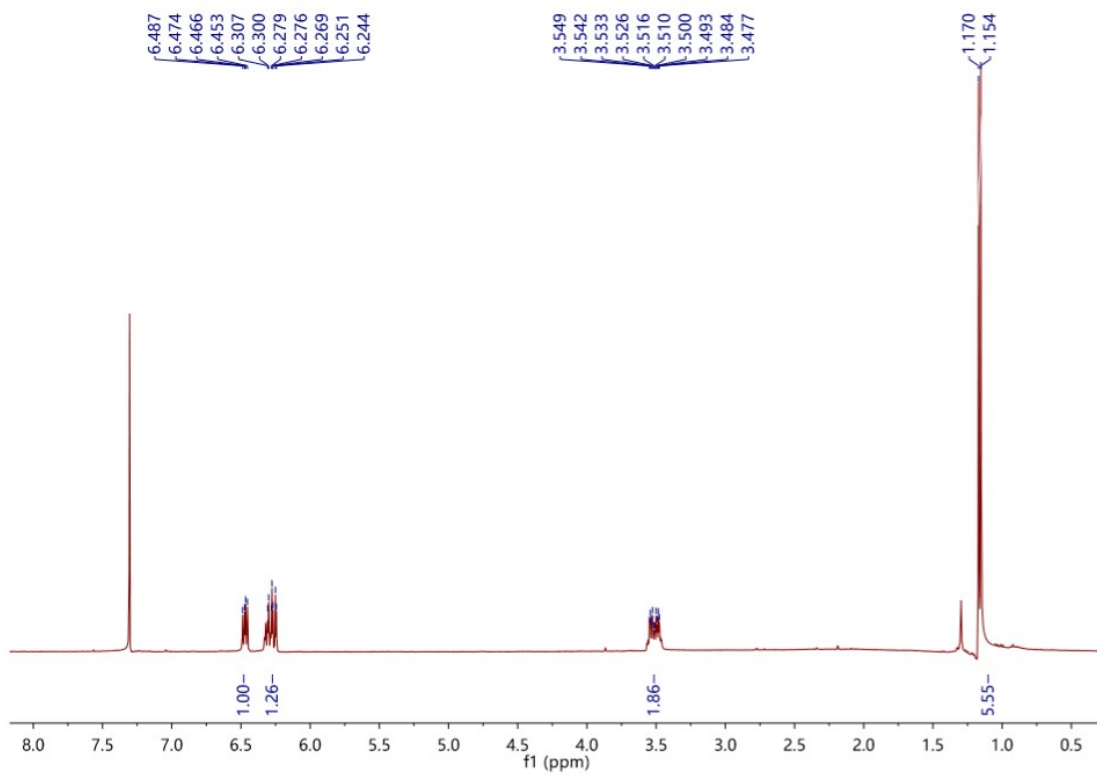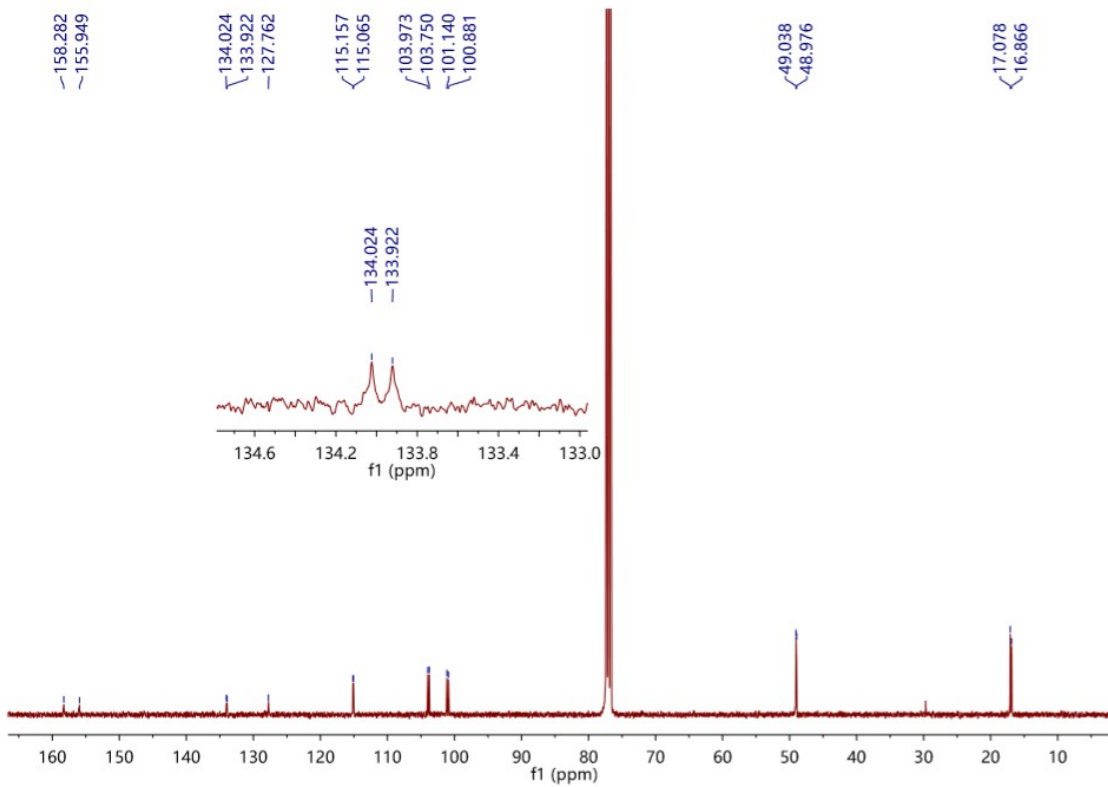

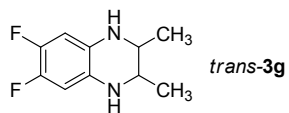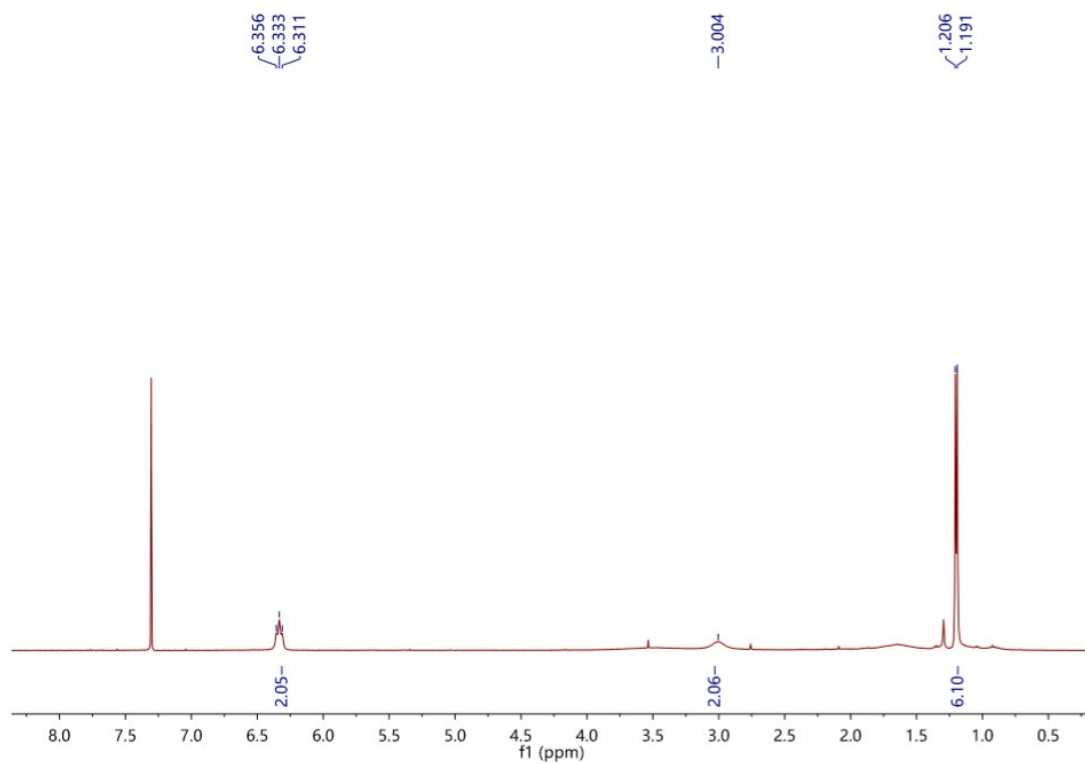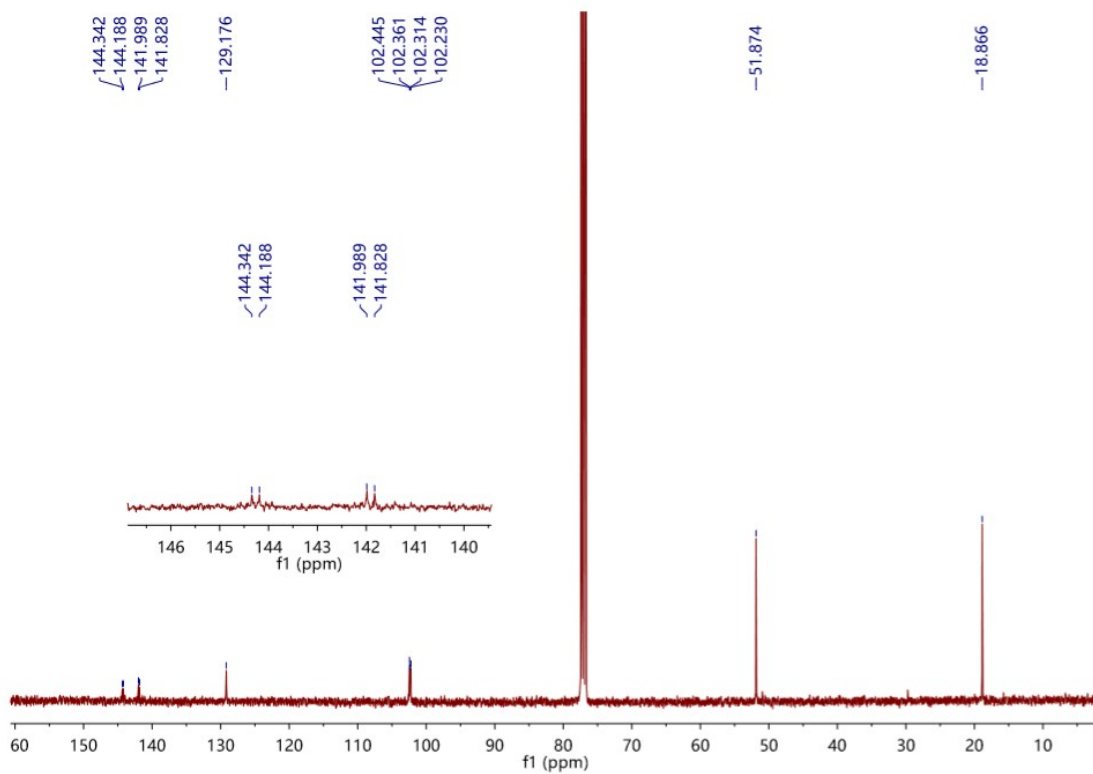

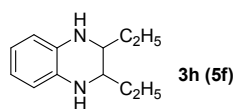

*cis/trans* of **3h** = 0/100 determined by <sup>1</sup>H NMR of the crude product (*cis* isomer was not detected).

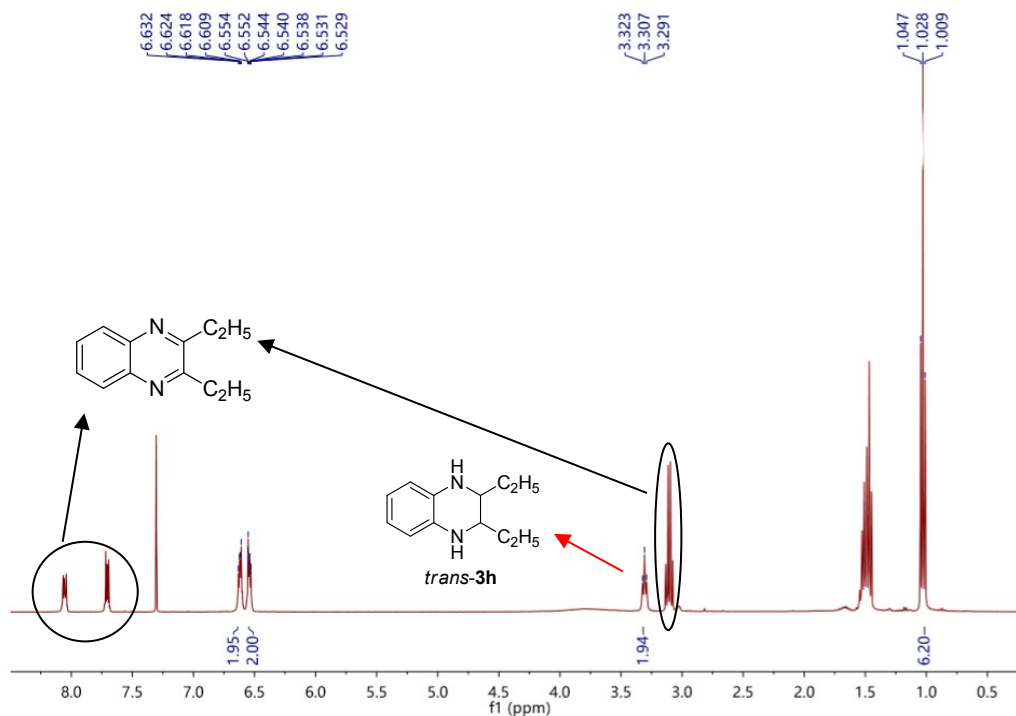

*cis/trans* of **5f** = 0/100 determined by <sup>1</sup>H NMR of the crude product (*cis* isomer was not detected).

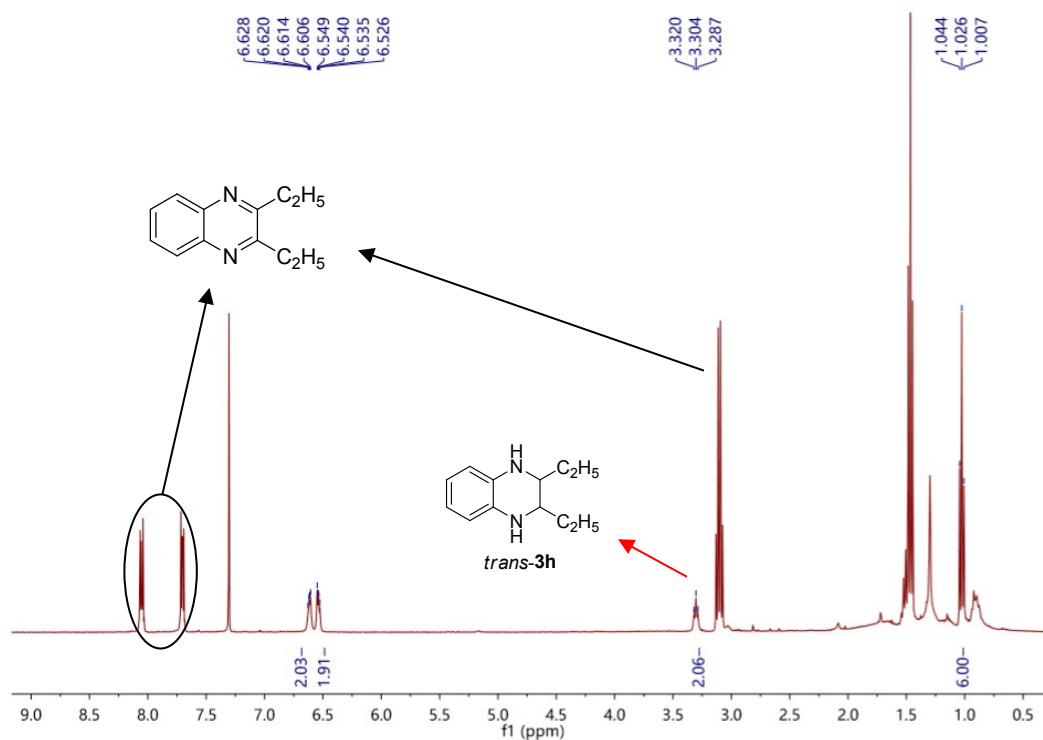

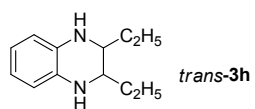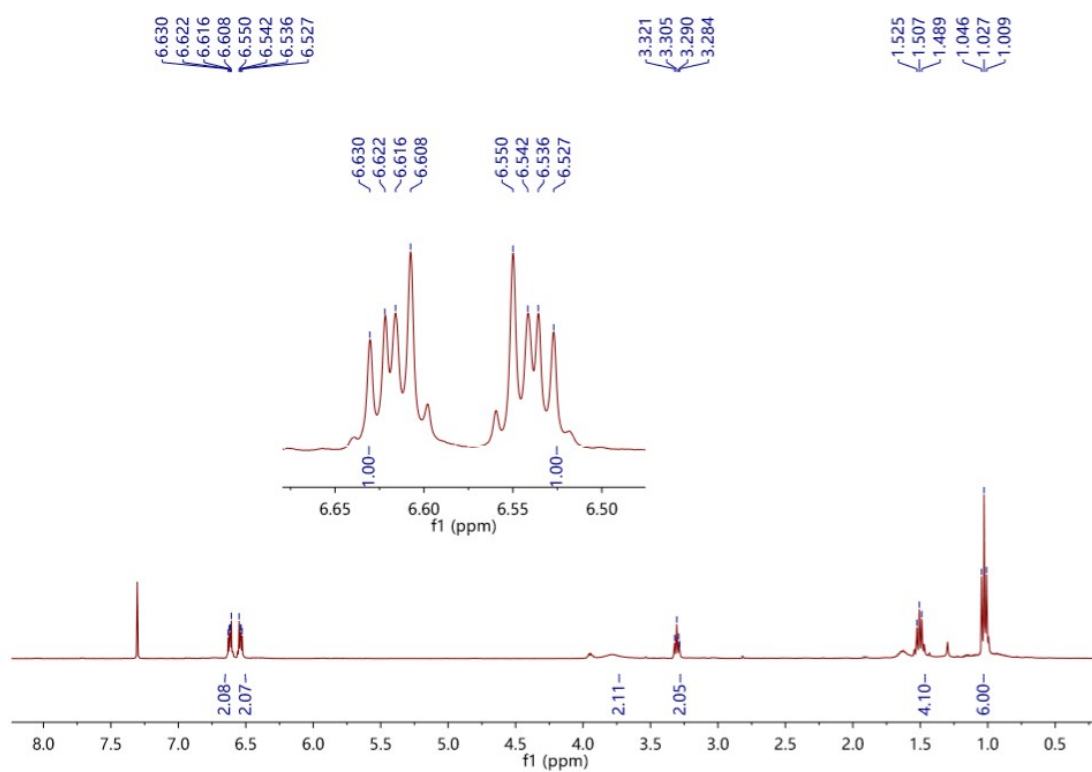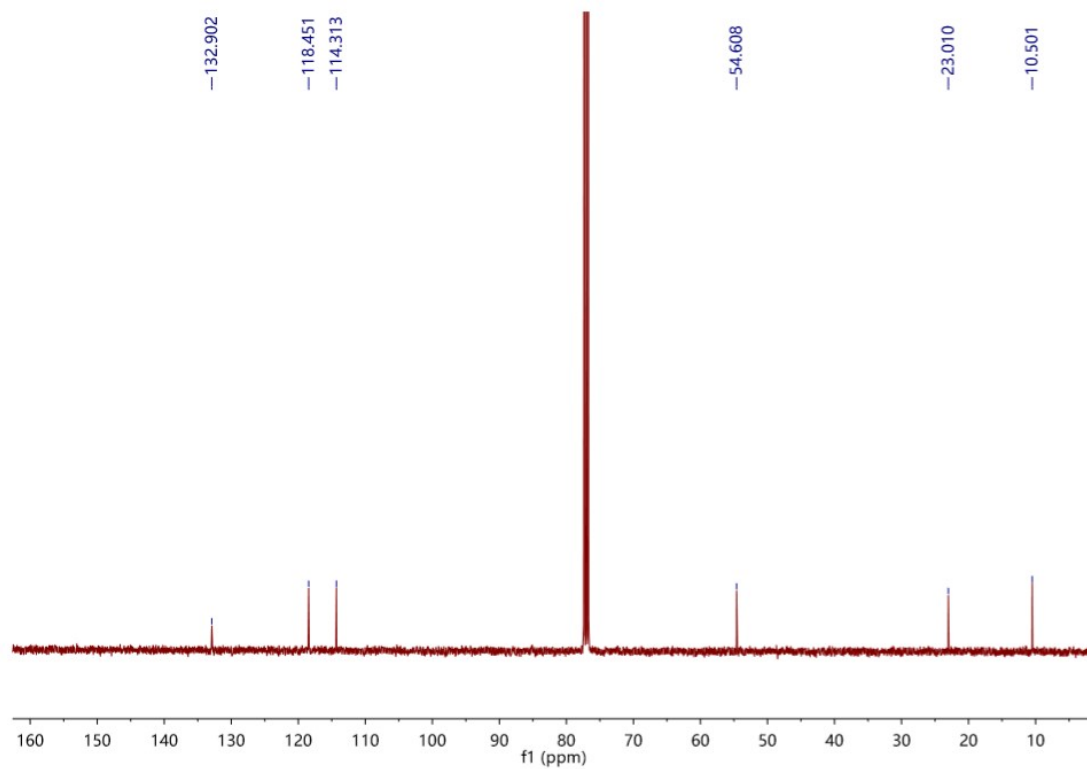

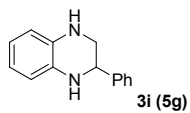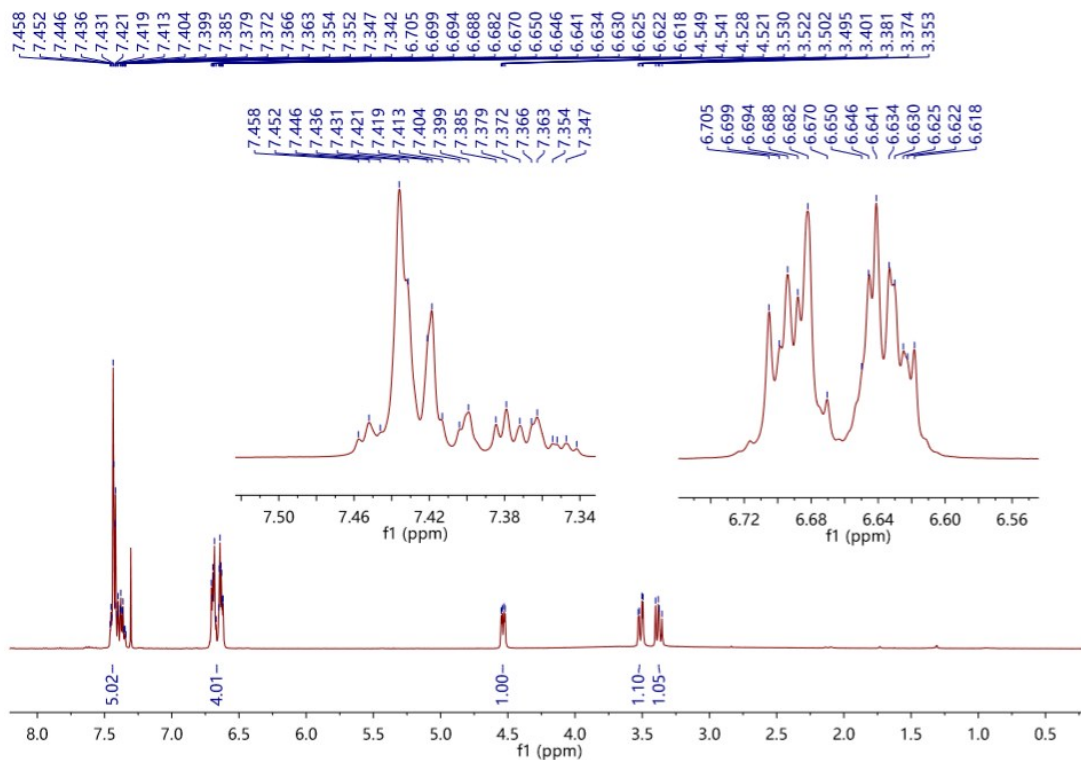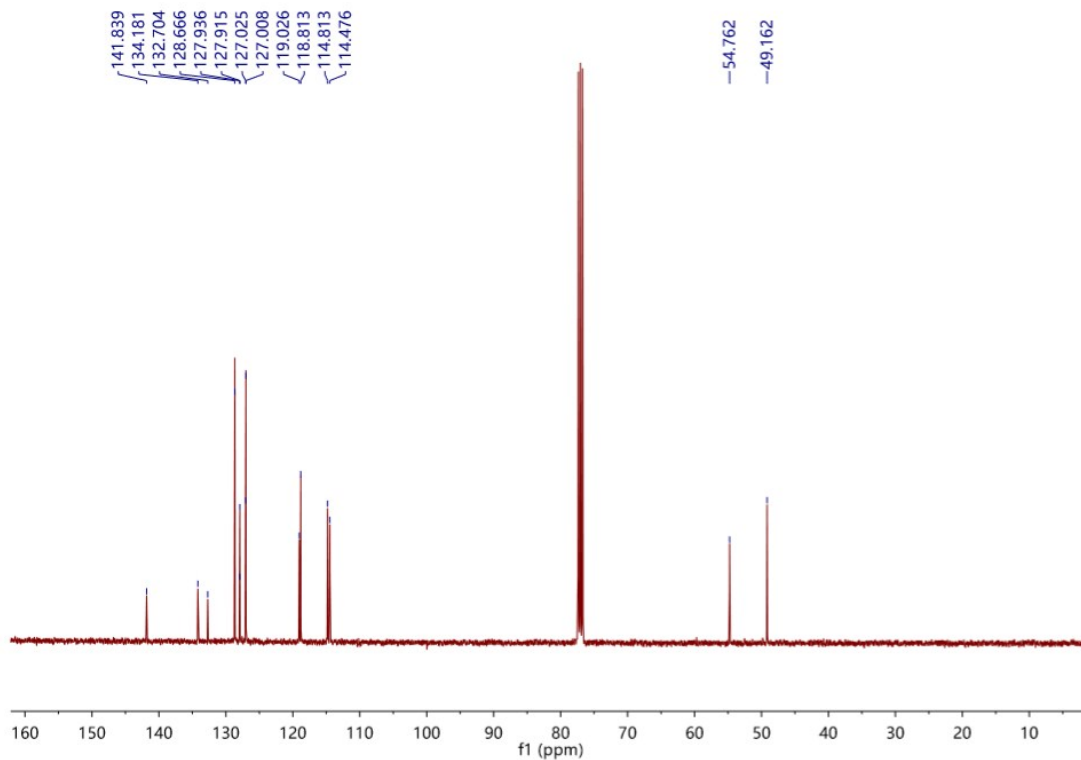

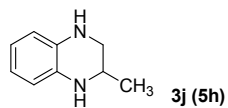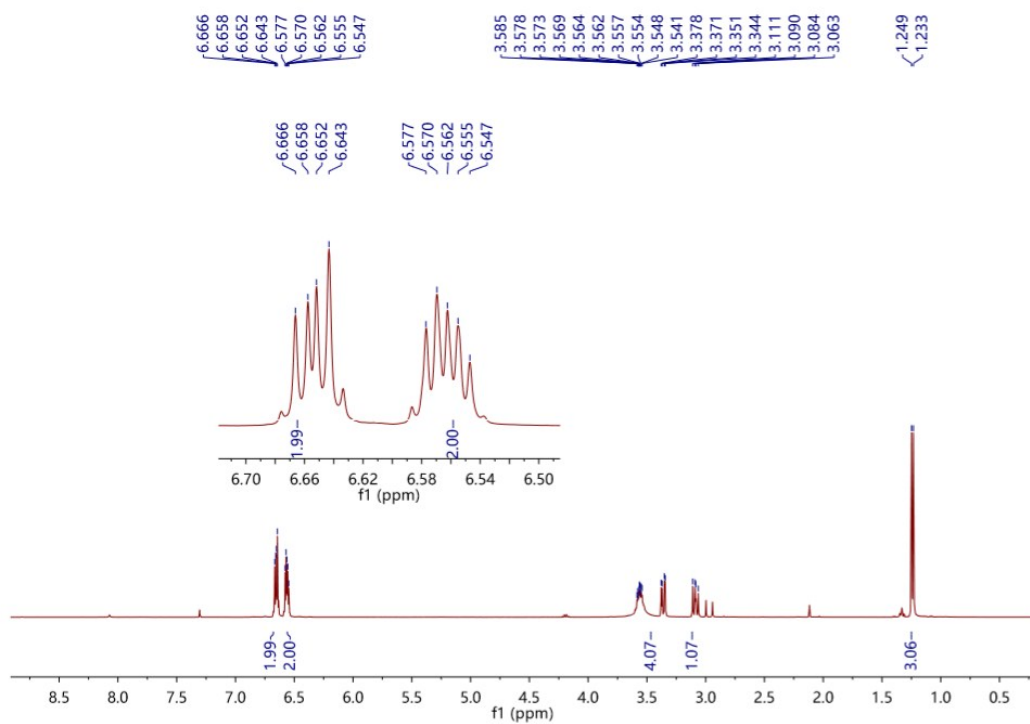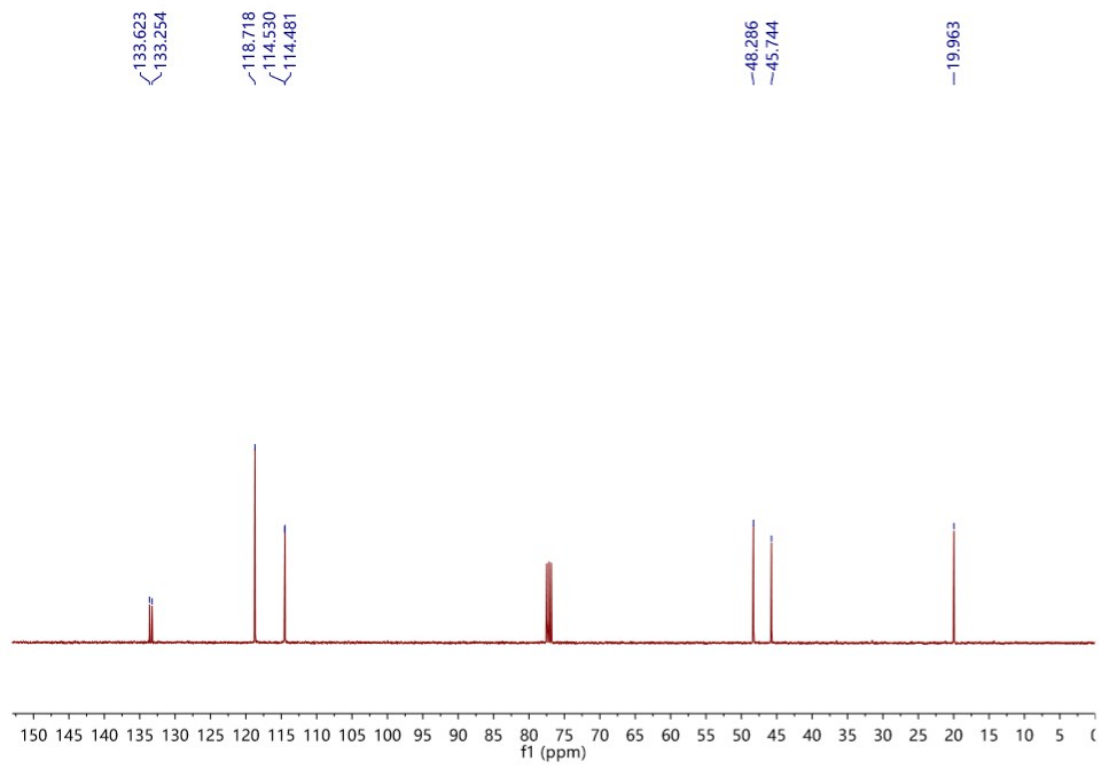



## 5. The Deuterium Labeling Experiment

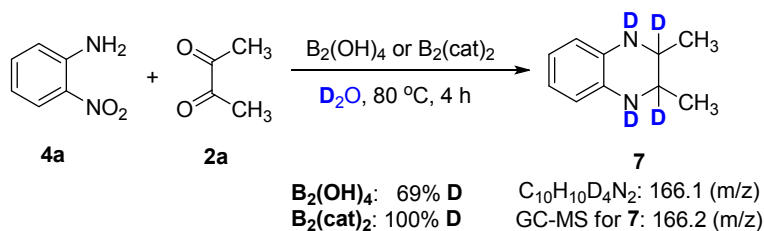

A flask was charged with 2-nitroaniline (**4a**, 1 mmol, 138 mg), 2,3-butanedione (**2a**, 1 mmol, 86 mg),  $\text{B}_2(\text{OH})_4$  or  $\text{B}_2(\text{cat})_2$  (8 mmol) and  $\text{D}_2\text{O}$  (3 mL) under  $\text{N}_2$ . The reaction was stirred at 80 °C for 4 h. When the reaction was complete monitored by TLC, the mixture was cooled to room temperature, extracted with ethyl acetate (3×20 mL). The combined organic phase was washed with water, dried over anhydrous  $\text{Na}_2\text{SO}_4$ , filtered, and concentrated under reduced pressure. The residue was purified by silica gel column chromatography to give the product **7**. The products were determined by  $^1\text{H}$  NMR and GC-MS.

### $\text{B}_2(\text{OH})_4$ :

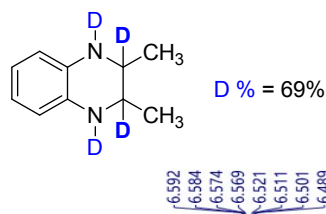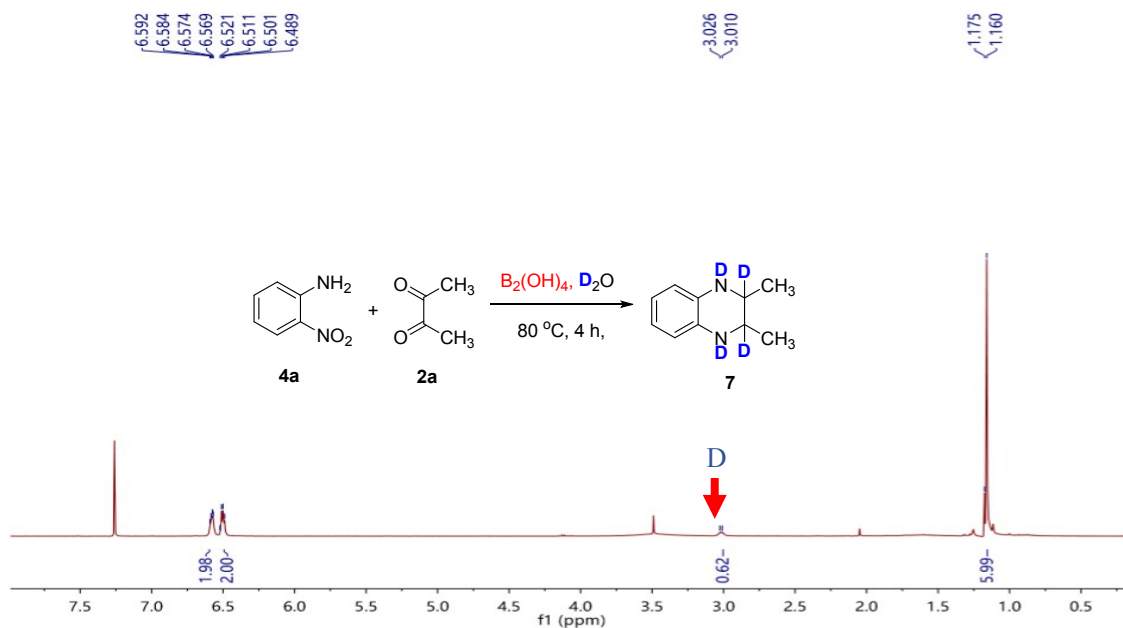

### B<sub>2</sub>(cat)<sub>2</sub>:

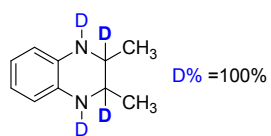

6.584  
6.572  
6.508  
6.497  
6.486

1.117

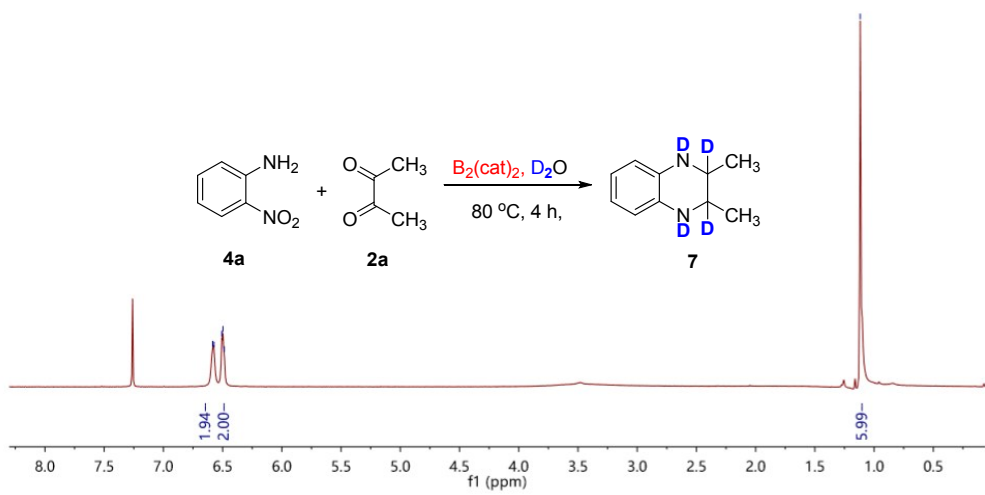

### GC-MS:

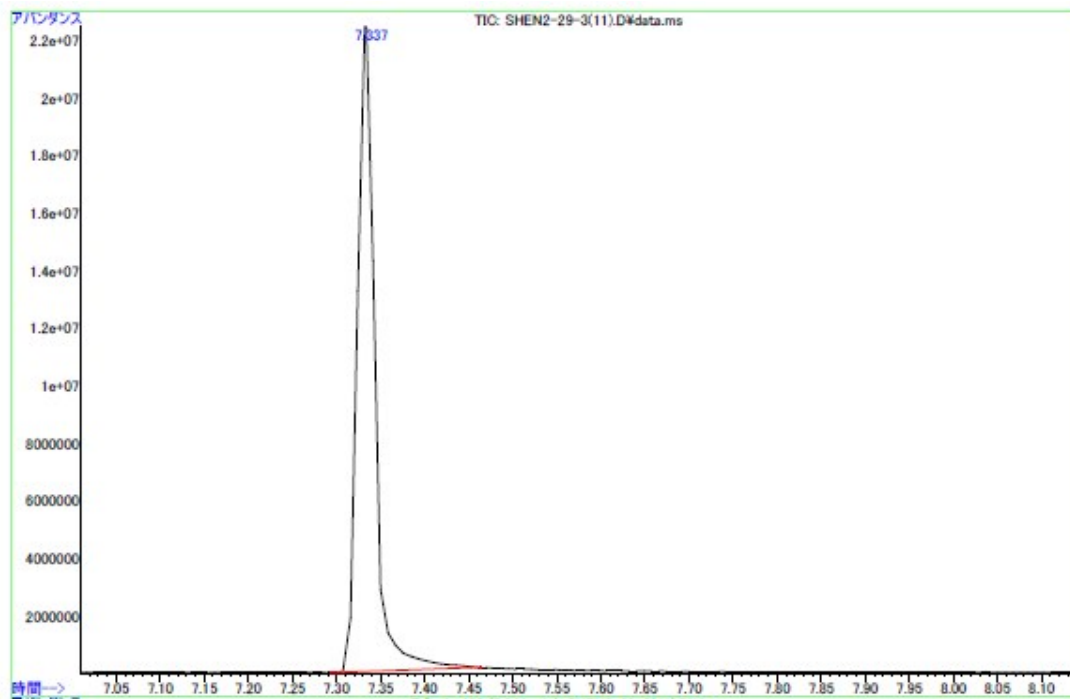

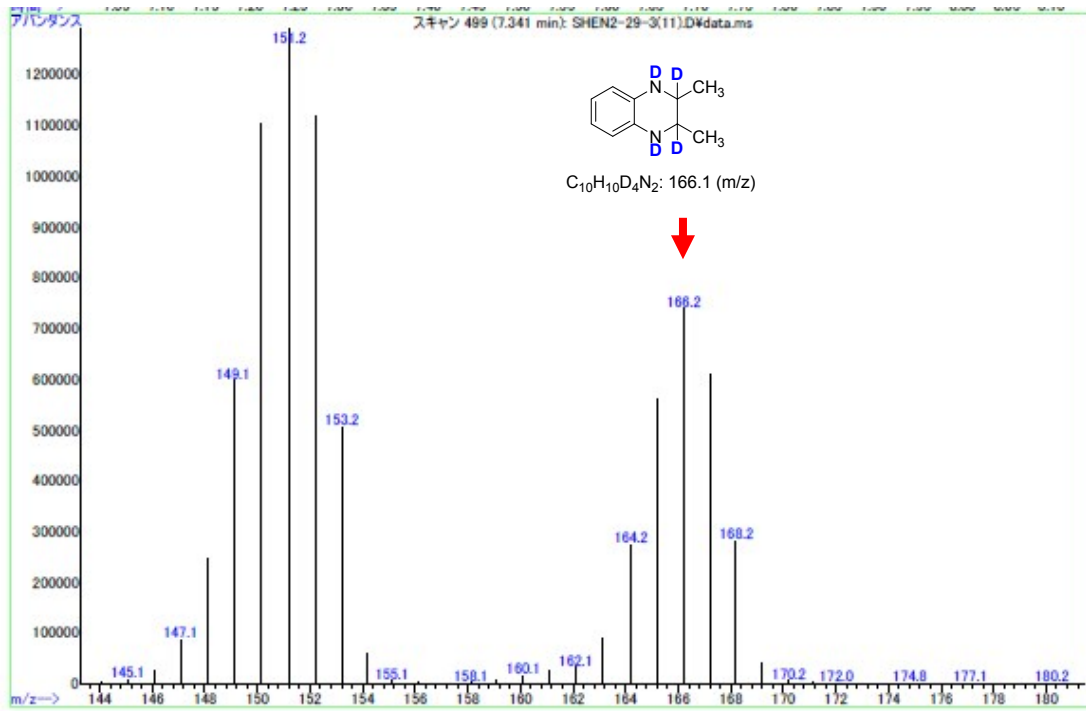

Supplement: c7qo00604g1.pdf [file c7qo00604g1.pdf]
